# Supplementary material for: Copper-catalyzed cross-dehydrogenative coupling between quinazoline-3-oxides and indoles
Source: Royal Society of Chemistry journal article supplement (doi:10.1039/c8ra09864f), 2019-01-01

## Copper-Catalyzed Cross-Dehydrogenative Coupling of Quinazoline-3-Oxides with Indoles

Qin Yang, Zhijian Yin, Lifang Zheng, Jianjun Yuan, Song Wei, Qiuping Ding,\* YiyuanPeng\*

<sup>a</sup> Key Laboratory of Functional Small Organic Molecule, Ministry of Education, and Jiangxi Province's Key Laboratory of Green Chemistry, Jiangxi Normal University, Nanchang, Jiangxi, 330022, China

### Supporting Information

|                                                                  |    |
|------------------------------------------------------------------|----|
| General experimental methods: .....                              | 2  |
| General experimental procedure: .....                            | 2  |
| Characterization data for the products: .....                    | 2  |
| <sup>1</sup> H and <sup>13</sup> CNMR spectra of compounds ..... | 13 |

### General experimental methods:

Unless otherwise stated, all commercial reagents were used as received. All solvents were dried and distilled according to standard procedures. Flash column chromatography was performed using silica gel (60-Å pore size, 32-63µm, standard grade). Analytical thin-layer chromatography was performed using glass plates pre-coated with 0.25 mm 230-400 mesh silica gel impregnated with a fluorescent indicator (254 nm). Thin layer chromatography plates were visualized by exposure to ultraviolet light. Organic solutions were concentrated on rotary evaporators at ~20 Torr at 25-35°C. Nuclear magnetic resonance (NMR) spectra are recorded in parts per million from internal tetramethylsilane on the  $\delta$  scale.  $^1\text{H}$  and  $^{13}\text{C}$  NMR spectra were recorded in  $\text{CDCl}_3$  on a Bruker DRX-400 spectrometer operating at 400 MHz and 100 MHz, respectively. All chemical shift values are quoted in ppm and coupling constants quoted in Hz. High resolution mass spectrometry (HRMS) spectra were obtained on a micrOTOF II Instrument.

### General experimental procedure:

The quinazoline-3-oxide (0.2 mmol), indoles (0.3 mmol),  $\text{CuCl}_2$  (0.02 mmol) and 2 mL  $\text{CH}_3\text{OH}$  were mixed in a dry reaction tube. The mixture was stirred at 60°C under air for 16 hours. After completion of the reaction (monitored by TLC), the mixture was concentrated in vacuum and the residue was purified by flash column chromatography on silica gel with petroleum ether-ethyl acetate as eluent to give the desired product.

### Characterization data for the products:

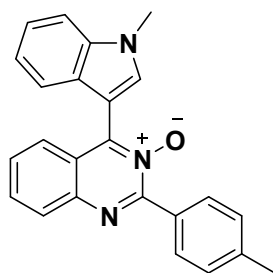

**4-(1-methyl-1H-indol-3-yl)-2-(p-tolyl)quinazoline 3-oxide (3aa).** Compound was obtained as a yellow solid: yield 78%;  $^1\text{H}$  NMR (400 MHz,  $\text{CDCl}_3$ )  $\delta$  8.30 (s, 1H), 8.22 (d,  $J = 8.0$  Hz, 2H), 8.04 (d,  $J = 8.0$  Hz, 1H), 7.92 (d,  $J = 8.4$  Hz, 1H), 7.69 (td,  $J = 7.6, 1.2$  Hz, 1H), 7.52 - 7.40 (m, 3H), 7.36-7.27 (m, 3H), 7.19 (t,  $J = 7.6$  Hz, 1H), 3.94 (s, 3H), 2.43 (s, 3H).  $^{13}\text{C}$  NMR (101 MHz,  $\text{CDCl}_3$ )  $\delta$  155.7, 147.1, 141.2, 140.7, 136.7, 135.5, 130.6, 130.5, 130.3, 128.7, 128.6, 128.0, 127.6, 126.5, 123.1, 122.5, 121.7, 121.0, 110.0, 102.6, 33.6, 21.6. HRMS (ESI):  $m/z$   $[\text{M} + \text{H}]^+$  calcd for

C<sub>24</sub>H<sub>20</sub>N<sub>3</sub>O: 366.1606, found 366.1609.

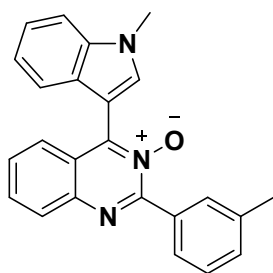

**4-(1-methyl-1H-indol-3-yl)-2-(*m*-tolyl)quinazoline 3-oxide (3ba).** Compound was obtained as a yellow solid: yield 87%; <sup>1</sup>H NMR (400 MHz, CDCl<sub>3</sub>) δ 8.32 (s, 1H), 8.12-7.85 (m, 3H), 7.95 (d, *J* = 8.4 Hz, 1H), 7.71 (t, *J* = 7.2 Hz, 1H), 7.54-7.36 (m, 4H), 7.35-7.28 (m, 2H), 7.18 (t, *J* = 7.2 Hz, 1H), 3.95 (s, 3H), 2.43 (s, 3H). <sup>13</sup>C NMR (101 MHz, CDCl<sub>3</sub>) δ 156.0, 147.1, 141.2, 137.5, 136.7, 135.6, 133.3, 131.2, 130.65, 130.61, 128.8, 128.1, 127.9, 127.6, 127.4, 126.6, 123.2, 122.5, 121.6, 121.0, 110.0, 102.5, 33.6, 21.5. HRMS (ESI): *m/z* [M + H]<sup>+</sup> calcd for C<sub>24</sub>H<sub>20</sub>N<sub>3</sub>O: 366.1606, found 366.1607.

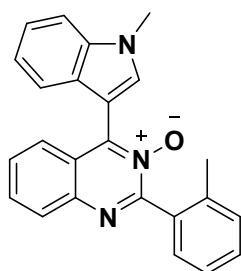

**4-(1-methyl-1H-indol-3-yl)-2-(*o*-tolyl)quinazoline 3-oxide (3ca).** Compound was obtained as a yellow solid: yield 71%; <sup>1</sup>H NMR (400 MHz, CDCl<sub>3</sub>) δ 8.43 (s, 1H), 8.11 - 8.02 (m, 2H), 7.74 (td, *J* = 7.2, 1.2 Hz, 1H), 7.59 - 7.53 (m, 2H), 7.51 - 7.43 (m, 2H), 7.43 - 7.37 (m, 1H), 7.37 - 7.30 (m, 3H), 7.20 (t, *J* = 7.6 Hz, 1H), 3.92 (s, 3H), 2.35 (s, 3H). <sup>13</sup>C NMR (101 MHz, CDCl<sub>3</sub>) δ 157.8, 146.7, 140.9, 137.1, 136.8, 136.3, 134.1, 130.7, 130.2, 129.6, 128.8, 128.8, 128.3, 127.6, 126.7, 125.8, 123.2, 122.6, 121.7, 121.1, 110.1, 102.4, 33.6, 19.7. HRMS (ESI): *m/z* [M + H]<sup>+</sup> calcd for C<sub>24</sub>H<sub>20</sub>N<sub>3</sub>O: 366.1606, found 366.1611.

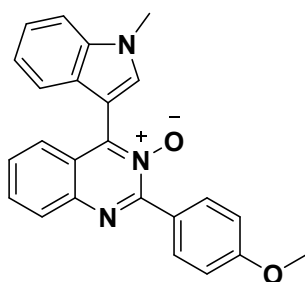

**2-(4-methoxyphenyl)-4-(1-methyl-1H-indol-3-yl)quinazoline 3-oxide (3da).** Compound was obtained as a yellow solid: yield 87%; <sup>1</sup>H NMR (400 MHz, CDCl<sub>3</sub>) δ 8.46 - 8.37 (m, 2H), 8.28 (s, 1H), 8.03 (d, *J* = 8.0 Hz, 1H), 7.91 (d, *J* = 8.4 Hz, 1H), 7.70 (td, *J* = 7.4, 1.2 Hz, 1H), 7.51 - 7.41 (m, 3H), 7.33 (t, *J* = 7.6 Hz, 1H), 7.19 (t, *J* = 7.6 Hz, 1H), 7.05 - 6.98 (m, 2H), 3.96 (s, 3H), 3.89 (s, 3H). <sup>13</sup>C NMR (101 MHz, CDCl<sub>3</sub>) δ 161.5, 155.1, 147.2, 141.3, 136.7, 135.3, 132.4, 130.6, 128.6, 127.8, 127.6,

126.5, 125.7, 123.0, 122.5, 121.7, 120.9, 113.3, 110.0, 102.7, 55.4, 33.6. HRMS (ESI):  $m/z$   $[M + H]^+$  calcd for  $C_{24}H_{20}N_3O_2$ : 382.1556, found 382.1555.

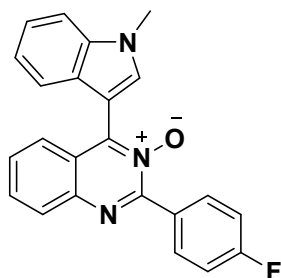

**2-(4-fluorophenyl)-4-(1-methyl-1H-indol-3-yl)quinazoline 3-oxide (3ea).**

Compound was obtained as a yellow solid: yield 83%;  $^1H$  NMR (400 MHz,  $CDCl_3$ )  $\delta$  8.45 - 8.35 (m, 2H), 8.30 (s, 1H), 8.05 (d,  $J = 8.0$  Hz, 1H), 7.95 (d,  $J = 8.0$  Hz, 1H), 7.73 (t,  $J = 7.6$  Hz, 1H), 7.51 (t,  $J = 7.6$  Hz, 1H), 7.49-7.41 (m, 2H), 7.34 (t,  $J = 7.6$  Hz, 1H), 7.23-7.14 (m, 3H), 3.97 (s, 3H).  $^{13}C$  NMR (101 MHz,  $CDCl_3$ )  $\delta$  164.2 (d,  $J = 249.2$  Hz), 154.5, 141.2, 136.8, 135.5, 132.8 (d,  $J = 8.5$  Hz), 129.4 (d,  $J = 3.3$  Hz), 128.7, 128.2, 127.5, 126.6, 123.2, 122.6, 121.6, 121.1, 114.9 (d,  $J = 21.6$  Hz), 110.1, 102.5, 33.6. HRMS (ESI):  $m/z$   $[M + H]^+$  calcd for  $C_{23}H_{17}FN_3O$ : 370.1356, found 370.1381.

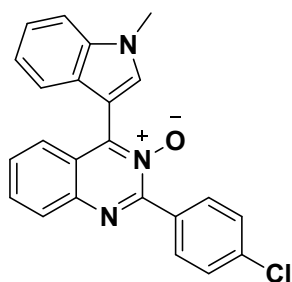

**2-(4-chlorophenyl)-4-(1-methyl-1H-indol-3-yl)quinazoline 3-oxide (3fa).**

Compound was obtained as a yellow solid: yield 82%;  $^1H$  NMR (400 MHz,  $CDCl_3$ )  $\delta$  8.33 (d,  $J = 8.4$  Hz, 2H), 8.28 (s, 1H), 8.05 (d,  $J = 8.0$  Hz, 1H), 7.95 (d,  $J = 8.4$  Hz, 1H), 7.72 (t,  $J = 7.2$  Hz, 1H), 7.55-7.41 (m, 5H), 7.34 (t,  $J = 7.4$  Hz, 1H), 7.19 (t,  $J = 7.4$  Hz, 1H), 3.95 (s, 3H).  $^{13}C$  NMR (101 MHz,  $CDCl_3$ )  $\delta$  154.4, 147.5, 141.2, 136.8, 136.6, 135.5, 131.9, 131.7, 130.9, 128.8, 128.3, 128.1, 127.5, 126.6, 123.2, 122.6, 121.6, 121.1, 110.1, 102.4, 33.6. HRMS (ESI):  $m/z$   $[M + H]^+$  calcd for  $C_{23}H_{17}ClN_3O$ : 386.1060, found 386.1075, and 388.1031, found 388.1044.

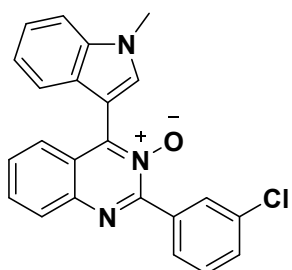

**2-(3-chlorophenyl)-4-(1-methyl-1H-indol-3-yl)quinazoline 3-oxide (3ga).**

Compound was obtained as a yellow solid: yield 83%;  $^1H$  NMR (400 MHz,  $CDCl_3$ )  $\delta$  8.35 (t,  $J = 1.6$  Hz, 1H), 8.29 (s, 1H), 8.25 - 8.19 (m, 1H), 8.05 (d,  $J = 8.4$  Hz, 1H), 7.95 (d,  $J = 8.4$  Hz, 1H), 7.72 (t,  $J = 7.6$  Hz, 1H), 7.56-7.40 (m, 5H), 7.33 (t,  $J = 7.4$

Hz, 1H), 7.19 (t,  $J = 7.6$  Hz, 1H), 3.95 (s, 3H).  $^{13}\text{C}$  NMR (101 MHz,  $\text{CDCl}_3$ )  $\delta$  154.1, 147.5, 141.1, 136.8, 135.5, 135.0, 133.9, 130.9, 130.5, 130.4, 129.1, 128.9, 128.6, 128.5, 127.5, 126.6, 123.3, 122.6, 121.6, 121.1, 110.1, 102.4, 33.6. HRMS (ESI):  $m/z$   $[\text{M} + \text{H}]^+$  calcd for  $\text{C}_{23}\text{H}_{17}\text{ClN}_3\text{O}$ : 386.1060, found 386.1075, and 388.1031, found 388.1045.

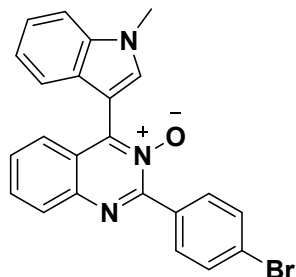

**2-(4-bromophenyl)-4-(1-methyl-1H-indol-3-yl)quinazoline 3-oxide 3-oxide (3ha).** Compound was obtained as a yellow solid: yield 76%;  $^1\text{H}$  NMR (400 MHz,  $\text{CDCl}_3$ )  $\delta$  8.28 (s, 1H), 8.25 (d,  $J = 8.4$  Hz, 2H), 8.05 (d,  $J = 8.4$  Hz, 1H), 7.95 (d,  $J = 8.4$  Hz, 1H), 7.73 (t,  $J = 7.4$  Hz, 1H), 7.64 (d,  $J = 8.8$  Hz, 2H), 7.52 (t,  $J = 7.6$  Hz, 1H), 7.48-7.41 (m, 2H), 7.34 (t,  $J = 7.6$  Hz, 1H), 7.20 (t,  $J = 7.4$  Hz, 1H), 3.96 (s, 3H).  $^{13}\text{C}$  NMR (101 MHz,  $\text{CDCl}_3$ )  $\delta$  154.5, 147.5, 141.2, 136.8, 135.5, 132.2, 132.1, 131.1, 130.9, 128.8, 128.4, 127.5, 126.6, 125.1, 123.2, 122.6, 121.6, 121.1, 110.1, 102.4, 33.6. HRMS (ESI):  $m/z$   $[\text{M} + \text{H}]^+$  calcd for  $\text{C}_{23}\text{H}_{17}\text{BrN}_3\text{O}$ : 430.0555, found 430.0557, and 432.0535, found 432.0537.

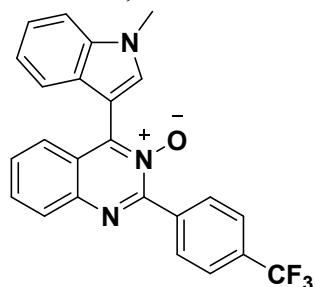

**4-(1-methyl-1H-indol-3-yl)-2-(4-(trifluoromethyl)phenyl)quinazoline 3-oxide (3ia).** Compound was obtained as a yellow solid: yield 93%;  $^1\text{H}$  NMR (400 MHz,  $\text{CDCl}_3$ )  $\delta$  8.43 (d,  $J = 8.0$  Hz, 2H), 8.31 (s, 1H), 8.07 (d,  $J = 8.0$  Hz, 1H), 7.99 (dd,  $J = 8.4, 0.4$  Hz, 1H), 7.77-7.73 (m, 3H), 7.55 (td,  $J = 7.8, 1.2$  Hz, 1H), 7.46 (t,  $J = 8.8$  Hz, 2H), 7.34 (td,  $J = 7.8, 1.2$  Hz, 1H), 7.20 (t,  $J = 7.8$  Hz, 1H), 3.96 (s, 3H).  $^{13}\text{C}$  NMR (101 MHz,  $\text{CDCl}_3$ )  $\delta$  154.2, 147.6, 141.2, 136.8, 135.7, 132.0 (q,  $J = 32.3$  Hz), 131.0, 130.7, 128.9, 128.7, 127.4, 126.7, 124.8 (q,  $J = 3.8$  Hz), 124.0 (q,  $J = 207.7$  Hz), 123.4, 122.7, 121.6, 121.2, 110.1, 102.3, 33.6. HRMS (ESI):  $m/z$   $[\text{M} + \text{H}]^+$  calcd for  $\text{C}_{24}\text{H}_{17}\text{F}_3\text{N}_3\text{O}$ : 420.1324, found 420.1324.

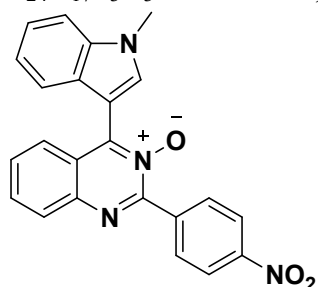

**4-(1-methyl-1*H*-indol-3-yl)-2-(4-nitrophenyl)quinazoline 3-oxide (3ja).** Compound was obtained as a yellow solid: yield 61%; <sup>1</sup>H NMR (400 MHz, CDCl<sub>3</sub>) δ 8.58 - 8.50 (m, 2H), 8.38 - 8.29 (m, 3H), 8.08 (d, *J* = 8.4 Hz, 1H), 8.00 (d, *J* = 8.0 Hz, 1H), 7.60-7.55 (m, 1H), 7.60-7.55 (m, 1H), 7.48 (d, *J* = 8.4 Hz, 1H), 7.44 (d, *J* = 8.0 Hz, 1H), 7.77 (td, *J* = 7.8, 1.2 Hz, 1H), 7.58 (td, *J* = 7.8, 1.2 Hz, 1H), 7.48 (d, *J* = 8.4 Hz, 1H), 7.44 (d, *J* = 8.0 Hz, 1H), 7.35 (td, *J* = 7.6, 1.0 Hz, 1H), 7.21 (td, *J* = 7.6, 1.0 Hz, 1H), 3.98 (s, 3H). <sup>13</sup>C NMR (101 MHz, CDCl<sub>3</sub>) δ 153.3, 148.7, 141.3, 139.4, 136.8, 135.7, 131.5, 131.3, 129.01, 128.99, 127.4, 126.8, 123.4, 122.9, 122.8, 121.5, 121.3, 110.2, 102.2, 33.7. HRMS (ESI): *m/z* [M + H]<sup>+</sup> calcd for C<sub>23</sub>H<sub>17</sub>N<sub>4</sub>O<sub>3</sub>: 397.1301, found 397.1276.

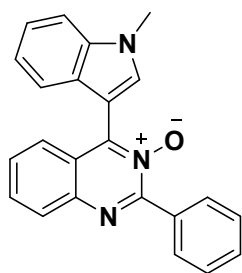

**4-(1-methyl-1*H*-indol-3-yl)-2-phenylquinazoline 3-oxide (3ka).** Compound was obtained as a yellow solid: yield 79%; <sup>1</sup>H NMR (400 MHz, CDCl<sub>3</sub>) δ 8.37-8.22 (m, 3H), 8.07 (d, *J* = 8.0 Hz, 1H), 7.96 (d, *J* = 8.0 Hz, 1H), 7.71 (t, *J* = 7.1 Hz, 1H), 7.58 - 7.41 (m, 6H), 7.34 (t, *J* = 7.2 Hz, 1H), 7.20 (t, *J* = 7.2 Hz, 1H), 3.95 (s, 3H). <sup>13</sup>C NMR (101 MHz, CDCl<sub>3</sub>) δ 155.7, 147.1, 141.2, 136.7, 135.6, 133.4, 130.6, 130.4, 130.3, 128.8, 128.1, 127.9, 127.6, 126.6, 123.2, 122.5, 121.6, 121.0, 110.0, 102.5, 33.6. HRMS (ESI): *m/z* [M + H]<sup>+</sup> calcd for C<sub>23</sub>H<sub>18</sub>N<sub>3</sub>O: 352.1450, found 352.1437.

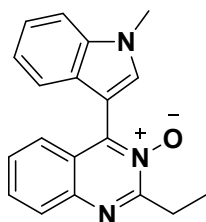

**2-ethyl-4-(1-methyl-1*H*-indol-3-yl)quinazoline 3-oxide (3la).** Compound was obtained as a yellow solid: yield 72%; <sup>1</sup>H NMR (400 MHz, CDCl<sub>3</sub>) δ 8.22 (s, 1H), 7.98 (d, *J* = 8.0 Hz, 1H), 7.90 (d, *J* = 8.4 Hz, 1H), 7.68 (t, *J* = 7.6 Hz, 1H), 7.51 - 7.41 (m, 2H), 7.38 (d, *J* = 8.0 Hz, 1H), 7.31 (t, *J* = 7.4 Hz, 1H), 7.16 (t, *J* = 7.4 Hz, 1H), 3.94 (s, 3H), 3.34 (q, *J* = 7.2 Hz, 2H), 1.53 (t, *J* = 7.2 Hz, 3H). <sup>13</sup>C NMR (101 MHz, CDCl<sub>3</sub>) δ 161.3, 145.8, 140.7, 136.7, 135.1, 130.4, 1228.2, 127.5, 126.5, 122.8, 122.5, 121.6, 120.9, 110.0, 102.5, 33.5, 26.3, 10.3. HRMS (ESI): *m/z* [M + H]<sup>+</sup> calcd for C<sub>19</sub>H<sub>18</sub>N<sub>3</sub>O: 304.1450, found 304.1456.

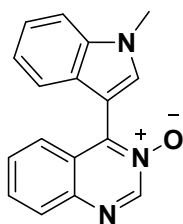

**4-(1-methyl-1*H*-indol-3-yl)quinazoline 3-oxide (3ma).** Compound was obtained as a yellow solid: yield 68%; <sup>1</sup>H NMR (400 MHz, CDCl<sub>3</sub>) δ 9.10 (s, 1H), 8.26 (s, 1H), 8.14-7.89 (m, 2H), 7.70 (t, *J* = 7.6 Hz, 1H), 7.53 (t, *J* = 7.6 Hz, 1H), 7.44 (d, *J* = 8.4 Hz, 1H), 7.39 (d, *J* = 8.0 Hz, 1H), 7.32 (t, *J* = 7.6 Hz, 1H), 7.17 (t, *J* = 7.4 Hz, 1H), 3.94 (s, 3H). <sup>13</sup>C NMR (101 MHz, CDCl<sub>3</sub>) δ 148.6, 141.5, 136.8, 135.4, 130.8, 128.8, 128.7, 127.2, 126.8, 123.2, 122.7, 121.5, 121.1, 110.1, 101.7, 33.6. HRMS (ESI): *m/z* [M + H]<sup>+</sup> calcd for C<sub>17</sub>H<sub>14</sub>N<sub>3</sub>O: 276.1137, found 276.1132.

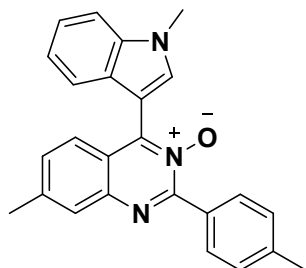

**7-methyl-4-(1-methyl-1*H*-indol-3-yl)-2-(*p*-tolyl)quinazoline 3-oxide (3na).** Compound was obtained as a yellow solid: yield 71%; <sup>1</sup>H NMR (400 MHz, CDCl<sub>3</sub>) δ 8.31 (s, 1H), 8.22 (d, *J* = 8.0 Hz, 2H), 7.82 (d, *J* = 8.8 Hz, 2H), 7.45 (dd, *J* = 8.6, 1.8 Hz, 2H), 7.35 - 7.27 (m, 4H), 7.18 (t, *J* = 7.6 Hz, 1H), 3.95 (s, 3H), 2.56 (s, 3H), 2.43 (s, 3H). <sup>13</sup>C NMR (101 MHz, CDCl<sub>3</sub>) δ 155.6, 147.1, 141.6, 141.5, 140.6, 136.7, 135.5, 130.6, 130.3, 130.1, 128.5, 127.9, 127.6, 126.3, 122.4, 121.6, 121.1, 120.9, 110.0, 102.7, 33.6, 21.8, 21.6. HRMS (ESI): *m/z* [M + H]<sup>+</sup> calcd for C<sub>25</sub>H<sub>22</sub>N<sub>3</sub>O: 380.1763, found 380.1767.

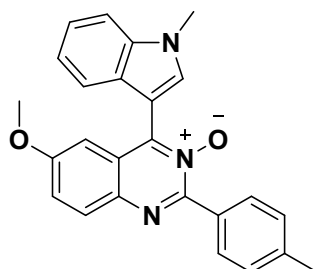

**6-methoxy-4-(1-methyl-1*H*-indol-3-yl)-2-(*p*-tolyl)quinazoline 3-oxide (3oa).** Compound was obtained as a yellow solid: yield 52%; <sup>1</sup>H NMR (400 MHz, CDCl<sub>3</sub>) δ 8.37 (s, 1H), 8.18 (d, *J* = 8.0 Hz, 2H), 7.95 (d, *J* = 9.2 Hz, 1H), 7.50 - 7.43 (m, 2H), 7.37 - 7.27 (m, 4H), 7.22-7.16 (m, 2H), 3.96 (s, 3H), 3.67 (s, 3H), 2.43 (s, 3H). <sup>13</sup>C NMR (101 MHz, CDCl<sub>3</sub>) δ 158.9, 153.6, 146.0, 140.3, 137.3, 136.7, 135.5, 130.6, 130.3, 130.1, 128.6, 127.2, 124.1, 123.2, 122.4, 121.8, 120.6, 110.1, 104.6, 102.5, 55.7, 33.6, 21.6. HRMS (ESI): *m/z* [M + H]<sup>+</sup> calcd for C<sub>25</sub>H<sub>22</sub>N<sub>3</sub>O<sub>2</sub>: 396.1712, found 396.1737.

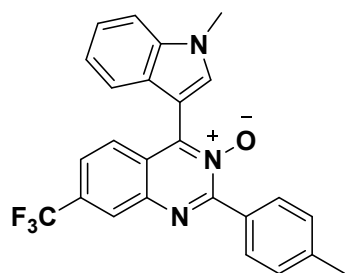

**4-(1-methyl-1*H*-indol-3-yl)-2-(*p*-tolyl)-7-(trifluoromethyl)quinazoline 3-oxide (3pa).** Compound was obtained as a yellow solid: yield 75%; <sup>1</sup>H NMR (400 MHz, CDCl<sub>3</sub>) δ 8.37-8.32 (m, 2H), 8.26 (d, *J* = 8.0 Hz, 2H), 8.06 (d, *J* = 8.8 Hz, 1H), 7.64 (dd, *J* = 8.8, 1.6 Hz, 1H), 7.47 (d, *J* = 8.4 Hz, 1H), 7.41 (d, *J* = 8.0 Hz, 1H), 7.37-7.30 (m, 3H), 7.21 (t, *J* = 7.6 Hz, 1H), 3.95 (s, 3H), 2.45 (s, 3H). <sup>13</sup>C NMR (101 MHz, CDCl<sub>3</sub>) δ 157.0, 147.0, 141.5, 140.2, 136.9, 136.0, 132.1 (q, *J* = 32.9 Hz), 130.5, 129.9, 128.8, 127.7, 127.4, 126.5 (q, *J* = 4.2 Hz), 124.6, 123.7 (q, *J* = 270.9 Hz), 123.6 (q, *J* = 3.0 Hz), 122.9, 121.45, 121.40, 110.3, 102.2, 33.7, 21.7. HRMS (ESI): *m/z* [M + H]<sup>+</sup> calcd for C<sub>25</sub>H<sub>19</sub>F<sub>3</sub>N<sub>3</sub>O: 434.1480, found 434.1478.

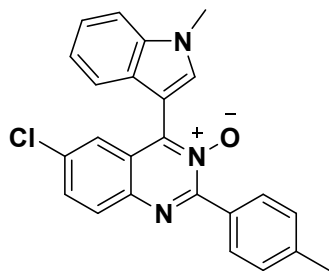

**6-chloro-4-(1-methyl-1*H*-indol-3-yl)-2-(*p*-tolyl)quinazoline 3-oxide (3qa).** Compound was obtained as a yellow solid: yield 83%; <sup>1</sup>H NMR (400 MHz, CDCl<sub>3</sub>) δ 8.23 (d, *J* = 8.8 Hz, 3H), 7.97 (d, *J* = 8.8 Hz, 1H), 7.93 (d, *J* = 2.0 Hz, 1H), 7.62 (dd, *J* = 8.8, 2.0 Hz, 1H), 7.46 (d, *J* = 8.8 Hz, 2H), 7.47-7.29 (m, 3H), 7.22 (t, *J* = 7.6 Hz, 1H), 3.96 (s, 3H), 2.44 (s, 3H). <sup>13</sup>C NMR (101 MHz, CDCl<sub>3</sub>) δ 155.9, 146.3, 141.1, 139.4, 136.8, 135.3, 134.0, 131.2, 130.3, 130.1, 131.2, 130.3, 130.1, 128.6, 127.2, 125.0, 124.0, 122.7, 121.4, 121.3, 110.1, 102.3, 33.6, 21.6. HRMS (ESI): *m/z* [M + H]<sup>+</sup> calcd for C<sub>24</sub>H<sub>19</sub>ClN<sub>3</sub>O: 400.1217, found 400.1219, and 402.1187, found 402.1188.

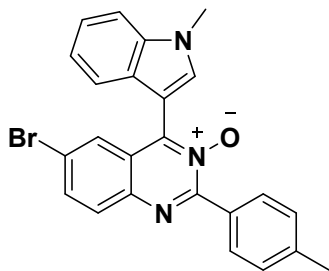

**6-bromo-4-(1-methyl-1*H*-indol-3-yl)-2-(*p*-tolyl)quinazoline 3-oxide (3ra).** Compound was obtained as a yellow solid: yield 84%; <sup>1</sup>H NMR (400 MHz, CDCl<sub>3</sub>) δ 8.31 - 8.19 (m, 3H), 8.10 (d, *J* = 1.6 Hz, 1H), 7.90 (d, *J* = 8.8 Hz, 1H), 7.75 (dd, *J* = 8.8, 1.6 Hz, 3H), 7.46 (d, *J* = 8.4 Hz, 2H), 7.37-7.28 (m, 3H), 7.23 (t, *J* = 7.6 Hz, 1H), 3.96 (s, 3H), 2.43 (s, 3H). <sup>13</sup>C NMR (101 MHz, CDCl<sub>3</sub>) δ 156.0, 146.3, 141.1, 139.7, 136.8, 135.3, 133.8, 130.34, 130.29, 130.1, 128.6, 128.3, 127.2, 124.4, 122.8, 122.0, 121.4, 121.3, 110.1, 102.3, 33.6, 21.6. HRMS (ESI): *m/z* [M + H]<sup>+</sup> calcd for C<sub>24</sub>H<sub>19</sub>BrN<sub>3</sub>O: 444.0711, found 444.0706, and 446.0691, found 446.0687.



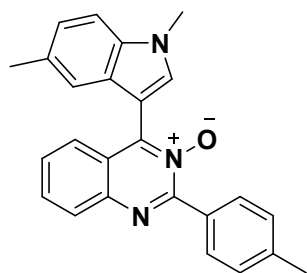

**4-(1,5-dimethyl-1H-indol-3-yl)-2-(p-tolyl)quinazoline 3-oxide (3ab).** Compound was obtained as a yellow solid: yield 76%;  $^1\text{H}$  NMR (400 MHz,  $\text{CDCl}_3$ )  $\delta$  8.24 (s, 1H), 8.22 (d,  $J = 8.4$  Hz, 2H), 8.05 (d,  $J = 8.4$  Hz, 1H), 7.94 (d,  $J = 8.4$  Hz, 1H), 7.71 (t,  $J = 7.6$  Hz, 1H), 7.49 (t,  $J = 7.8$  Hz, 1H), 7.34-7.30 (m, 3H), 7.22 (s, 1H), 7.14 (d,  $J = 8.4$  Hz, 1H), 3.92 (s, 3H), 2.43 (s, 3H), 2.40 (s, 3H).  $^{13}\text{C}$  NMR (101 MHz,  $\text{CDCl}_3$ )  $\delta$  155.7, 147.3, 141.2, 140.7, 135.4, 135.2, 130.5, 130.4, 130.3, 128.7, 128.6, 127.8, 126.6, 124.1, 123.2, 121.3, 109.7, 102.1, 33.6, 21.63, 21.57. HRMS (ESI):  $m/z$   $[\text{M} + \text{H}]^+$  calcd for  $\text{C}_{25}\text{H}_{21}\text{N}_3\text{O}$ : 380.1763, found 380.1762.

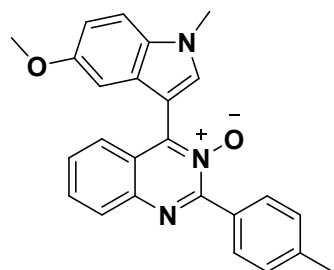

**4-(5-methoxy-1-methyl-1H-indol-3-yl)-2-(p-tolyl)quinazoline 3-oxide (3ac).** Compound was obtained as a yellow solid: yield 69%;  $^1\text{H}$  NMR (400 MHz,  $\text{CDCl}_3$ )  $\delta$  8.29 (s, 1H), 8.27 - 8.18 (m, 2H), 8.05 (d,  $J = 8.0$  Hz, 1H), 7.95 (d,  $J = 8.4$  Hz, 1H), 7.71 - 7.67 (m, 1H), 7.50 - 7.46 (m, 1H), 7.34-7.30 (m, 3H), 6.97 (dd,  $J = 8.8, 2.4$  Hz, 1H), 6.86 (d,  $J = 2.0$  Hz, 1H), 3.91 (s, 3H), 3.72 (s, 3H), 2.44 (s, 3H).  $^{13}\text{C}$  NMR (101 MHz,  $\text{CDCl}_3$ )  $\delta$  155.7, 155.1, 147.1, 141.2, 140.7, 135.8, 131.9, 130.6, 130.5, 130.3, 128.8, 128.6, 128.2, 127.7, 126.6, 122.9, 112.7, 110.7, 103.6, 102.3, 55.8, 33.7, 21.6. HRMS (ESI):  $m/z$   $[\text{M} + \text{H}]^+$  calcd for  $\text{C}_{25}\text{H}_{21}\text{N}_3\text{O}_2$ : 396.1712, found 396.1712.

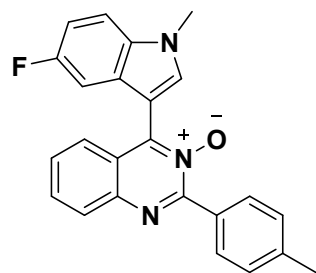

**4-(5-fluoro-1-methyl-1H-indol-3-yl)-2-(p-tolyl)quinazoline 3-oxide (3ad).** Compound was obtained as a yellow solid: yield 72%;  $^1\text{H}$  NMR (400 MHz,  $\text{CDCl}_3$ )  $\delta$  8.28 (s, 1H), 8.22 (d,  $J = 8.0$  Hz, 2H), 8.06 (d,  $J = 8.4$  Hz, 1H), 7.88 (d,  $J = 8.0$  Hz, 1H), 7.72 (t,  $J = 7.4$  Hz, 1H), 7.52 (t,  $J = 7.4$  Hz, 1H), 7.38-7.35 (m, 1H), 7.31 (d,  $J = 7.8$  Hz, 2H), 7.15 - 7.01 (m, 2H), 3.94 (s, 3H), 2.43 (s, 3H).  $^{13}\text{C}$  NMR (101 MHz,  $\text{CDCl}_3$ )  $\delta$  158.5 (d,  $J = 235.5$  Hz), 155.7, 146.7, 141.2, 140.9, 136.6, 133.4, 130.7, 130.3, 128.9, 128.6, 128.2, 128.0 (d,  $J = 10.4$  Hz), 126.1, 123.0, 111.2, 110.9, 110.8

(d,  $J = 9.8$  Hz), 107.0 (d,  $J = 24.8$  Hz), 102.8, 33.8, 29.7, 21.6. HRMS (ESI):  $m/z$  [ $M + H$ ]<sup>+</sup> calcd for C<sub>24</sub>H<sub>18</sub>FN<sub>3</sub>O: 384.1512, found 384.1501.

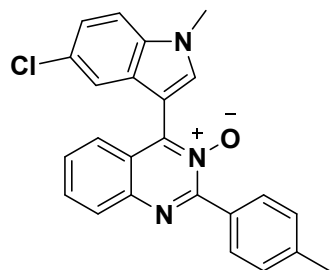

**4-(5-chloro-1-methyl-1H-indol-3-yl)-2-(p-tolyl)quinazoline 3-oxide (3ae).**

Compound was obtained as a yellow solid: yield 78%; <sup>1</sup>H NMR (400 MHz, CDCl<sub>3</sub>)  $\delta$  8.22 (d,  $J = 8.4$  Hz, 3H), 8.05 (d,  $J = 8.0$  Hz, 1H), 7.84 (d,  $J = 8.0$  Hz, 1H), 7.71 (t,  $J = 7.2$  Hz, 1H), 7.52 (t,  $J = 7.2$  Hz, 1H), 7.42 (s, 1H), 7.36 – 7.25 (m, 4H), 3.92 (s, 3H), 2.43 (s, 3H). <sup>13</sup>C NMR (101 MHz, CDCl<sub>3</sub>)  $\delta$  155.6, 146.5, 141.2, 140.9, 136.2, 135.2, 130.8, 130.3, 128.9, 128.6, 128.5, 128.3, 127.0, 126.0, 123.1, 123.0, 121.1, 111.0, 102.4, 33.7, 21.6. HRMS (ESI):  $m/z$  [ $M + H$ ]<sup>+</sup> calcd for C<sub>24</sub>H<sub>18</sub>ClN<sub>3</sub>O: 400.1217, found 400.1219, and 402.1187, found 402.1188.

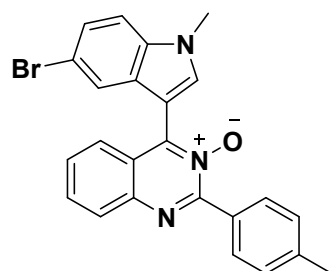

**4-(5-bromo-1-methyl-1H-indol-3-yl)-2-(p-tolyl)quinazoline 3-oxide (3af).**

Compound was obtained as a yellow solid: yield 87%; <sup>1</sup>H NMR (400 MHz, CDCl<sub>3</sub>)  $\delta$  8.22 (d,  $J = 8.0$  Hz, 1H), 8.19 (s, 1H), 8.05 (d,  $J = 8.4$  Hz, 1H), 7.83 (d,  $J = 8.0$  Hz, 1H), 7.71 (t,  $J = 6.8$  Hz, 1H), 7.57 (s, 1H), 7.52 (t,  $J = 7.2$  Hz, 1H), 7.40 (d,  $J = 8.4$  Hz, 1H), 7.31 (d,  $J = 8.0$  Hz, 3H), 3.92 (s, 3H), 2.43 (s, 3H). <sup>13</sup>C NMR (101 MHz, CDCl<sub>3</sub>)  $\delta$  155.6, 146.5, 141.2, 140.9, 136.1, 135.5, 130.8, 130.3, 129.1, 128.9, 128.6, 128.3, 126.0, 125.5, 124.1, 123.1, 114.5, 111.5, 102.4, 100.0, 33.7, 21.6. HRMS (ESI):  $m/z$  [ $M + H$ ]<sup>+</sup> calcd for C<sub>23</sub>H<sub>18</sub>BrN<sub>3</sub>O: 444.0711, found 444.0710, and 446.0691, found 446.0690.

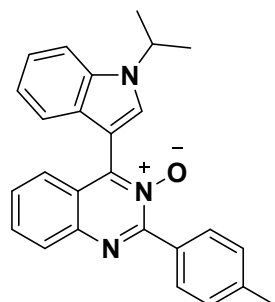

**4-(1-isopropyl-1H-indol-3-yl)-2-(p-tolyl)quinazoline 3-oxide (3ag).** Compound was obtained as a yellow solid: yield 88%; <sup>1</sup>H NMR (400 MHz, CDCl<sub>3</sub>)  $\delta$  8.46 (s, 1H),

8.19 (d,  $J = 8.0$  Hz, 2H), 8.05 (d,  $J = 8.0$  Hz, 1H), 7.94 (d,  $J = 8.4$  Hz, 1H), 7.70 (t,  $J = 7.4$  Hz, 1H), 7.56-7.44 (m, 3H), 7.36-7.28 (m, 3H), 7.18 (t,  $J = 7.4$  Hz, 1H), 4.90 - 4.75 (m, 1H), 2.44 (s, 3H), 1.67 (s, 3H), 1.65 (s, 3H).  $^{13}\text{C}$  NMR (101 MHz,  $\text{CDCl}_3$ )  $\delta$  155.9, 147.4, 141.3, 140.6, 135.7, 131.0, 130.61, 130.55, 130.2, 128.7, 128.6, 127.9, 127.8, 126.7, 123.2, 122.2, 121.9, 120.9, 110.3, 102.8, 48.1, 22.8, 21.6. HRMS (ESI):  $m/z$   $[\text{M} + \text{H}]^+$  calcd for  $\text{C}_{26}\text{H}_{24}\text{N}_3\text{O}$ : 394.1919, found 394.1919.

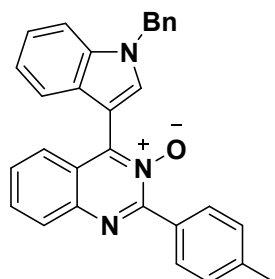

**4-(1-benzyl-1H-indol-3-yl)-2-(p-tolyl)quinazoline 3-oxide (3ah).** Compound was obtained as a yellow solid: yield 82%;  $^1\text{H}$  NMR (400 MHz,  $\text{CDCl}_3$ )  $\delta$  8.33 (s, 1H), 8.22 (d,  $J = 7.6$  Hz, 2H), 8.04 (d,  $J = 8.4$  Hz, 1H), 7.92 (d,  $J = 8.4$  Hz, 1H), 7.68 (t,  $J = 7.4$  Hz, 1H), 7.47 (t,  $J = 8.2$  Hz, 2H), 7.40 (d,  $J = 8.0$  Hz, 1H), 7.37 – 7.21 (m, 7H), 7.17 (t,  $J = 7.4$  Hz, 1H), 5.45 (s, 2H), 2.42 (s, 3H).  $^{13}\text{C}$  NMR (101 MHz,  $\text{CDCl}_3$ )  $\delta$  155.8, 147.0, 141.1, 140.7, 136.3, 134.8, 130.53, 130.47, 130.3, 129.0, 128.8, 128.6, 128.1, 128.0, 127.2, 126.4, 123.2, 122.6, 121.9, 121.1, 110.6, 103.4, 51.0, 21.6. HRMS (ESI):  $m/z$   $[\text{M} + \text{H}]^+$  calcd for  $\text{C}_{30}\text{H}_{24}\text{N}_3\text{O}$ : 442.1919, found 442.1935.

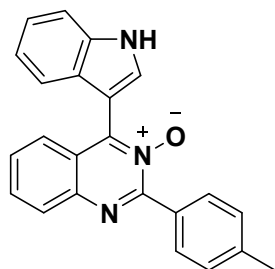

**4-(1H-indol-3-yl)-2-(p-tolyl)quinazoline 3-oxide (3ai).** Compound was obtained as a yellow solid: yield 83%;  $^1\text{H}$  NMR (400 MHz,  $\text{CDCl}_3$ )  $\delta$  10.24 (s, 1H), 8.28 (d,  $J = 7.2$  Hz, 2H), 8.05 (d,  $J = 8.4$  Hz, 1H), 7.77 (d,  $J = 8.4$  Hz, 1H), 7.71 (t,  $J = 7.2$  Hz, 1H), 7.57-7.39 (m, 3H), 7.33 (d,  $J = 7.6$  Hz, 2H), 7.08 (s, 3H), 2.44 (s, 3H).  $^{13}\text{C}$  NMR (101 MHz,  $\text{CDCl}_3$ )  $\delta$  155.5, 148.5, 141.5, 140.9, 136.1, 131.1, 131.0, 130.5, 130.4, 128.7, 128.6, 128.3, 126.6, 126.3, 123.5, 122.4, 121.4, 120.8, 112.3, 103.5, 21.6. HRMS (ESI):  $m/z$   $[\text{M} + \text{H}]^+$  calcd for  $\text{C}_{23}\text{H}_{18}\text{N}_3\text{O}$ : 352.1450, found 352.1447.

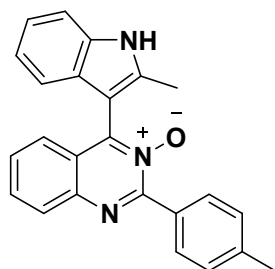

**4-(2-methyl-1H-indol-3-yl)-2-(p-tolyl)quinazoline 3-oxide (3aj).** Compound was obtained as a yellow solid: yield 58%;  $^1\text{H}$  NMR (400 MHz,  $\text{CDCl}_3$ )  $\delta$  9.55 (s, 1H),

8.31 (d,  $J = 8.0$  Hz, 2H), 8.06 (d,  $J = 8.4$  Hz, 1H), 7.69 (t,  $J = 7.6$  Hz, 1H), 7.56 (d,  $J = 8.4$  Hz, 1H), 7.44 (t,  $J = 7.6$  Hz, 1H), 7.32 (d,  $J = 8.0$  Hz, 2H), 7.18 (d,  $J = 7.7$  Hz, 1H), 7.05 (s, 3H), 2.43 (s, 3H), 2.04 (s, 3H).  $^{13}\text{C}$  NMR (101 MHz,  $\text{CDCl}_3$ )  $\delta$  155.7, 149.4, 141.03, 140.99, 139.7, 136.1, 130.8, 130.50, 130.45, 128.7, 128.5, 127.7, 126.6, 124.2, 121.4, 120.2, 119.5, 111.7, 101.3, 21.6, 13.7. HRMS (ESI):  $m/z$   $[\text{M} + \text{H}]^+$  calcd for  $\text{C}_{24}\text{H}_{20}\text{N}_3\text{O}$ : 366.1606, found 366.1602.

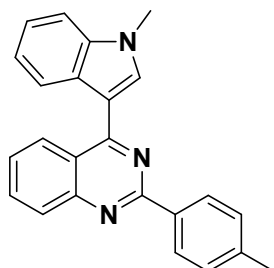

**4-(1-methyl-1H-indol-3-yl)-2-(p-tolyl)quinazoline (4a).** Compound was obtained as a off-white solid: yield 86%;  $^1\text{H}$  NMR (400 MHz,  $\text{CDCl}_3$ )  $\delta$  8.64 (d,  $J = 8.4$  Hz, 2H), 8.37 (d,  $J = 8.4$  Hz, 2H), 8.11 (d,  $J = 8.4$  Hz, 1H), 7.85 (td,  $J = 7.0, 1.2$  Hz, 1H), 7.76 (s, 1H), 7.53 (td,  $J = 7.6, 0.8$  Hz, 1H), 7.45 (d,  $J = 7.6$  Hz, 1H), 7.42 – 7.31 (m, 4H), 3.94 (s, 3H), 2.46 (s, 3H).  $^{13}\text{C}$  NMR (101 MHz,  $\text{CDCl}_3$ )  $\delta$  163.1, 160.4, 152.1, 140.4, 137.6, 136.1, 133.0, 132.7, 129.3, 129.1, 128.6, 127.4, 126.8, 126.3, 123.0, 122.1, 121.8, 121.4, 113.4, 109.7, 33.4, 21.54. HRMS (ESI):  $m/z$   $[\text{M} + \text{H}]^+$  calcd for  $\text{C}_{24}\text{H}_{19}\text{N}_3$ : 350.1657, found 350.1656.

# <sup>1</sup>H and <sup>13</sup>C NMR spectra of compounds

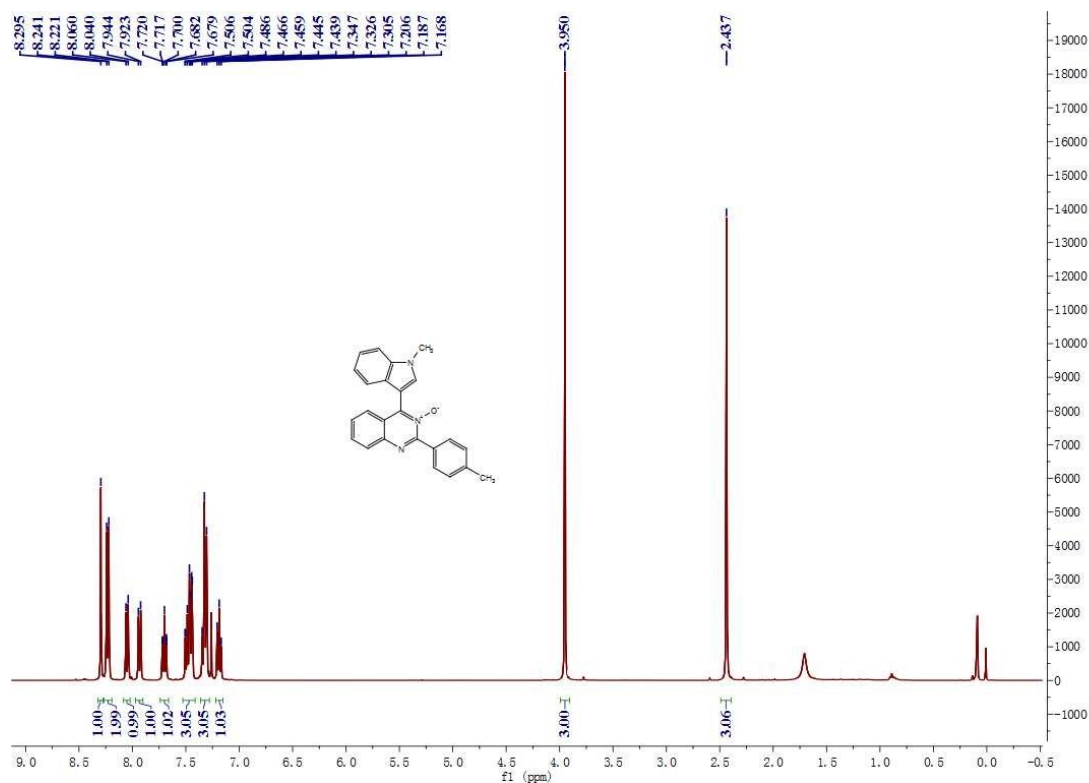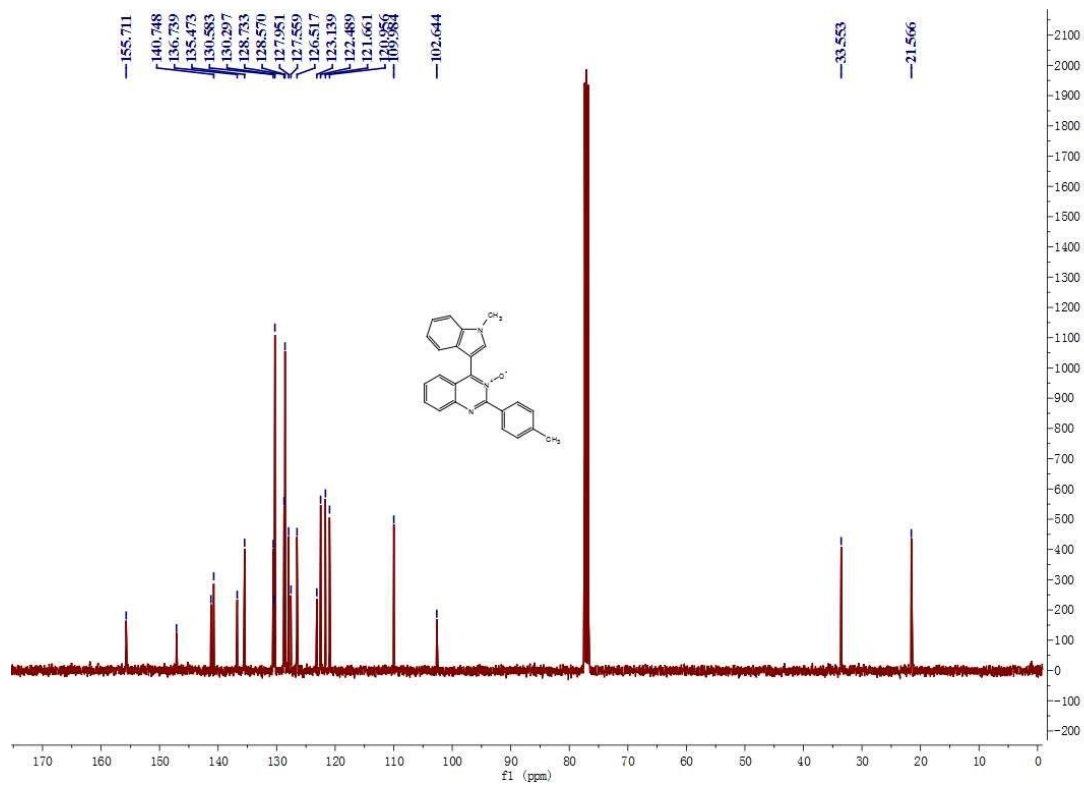

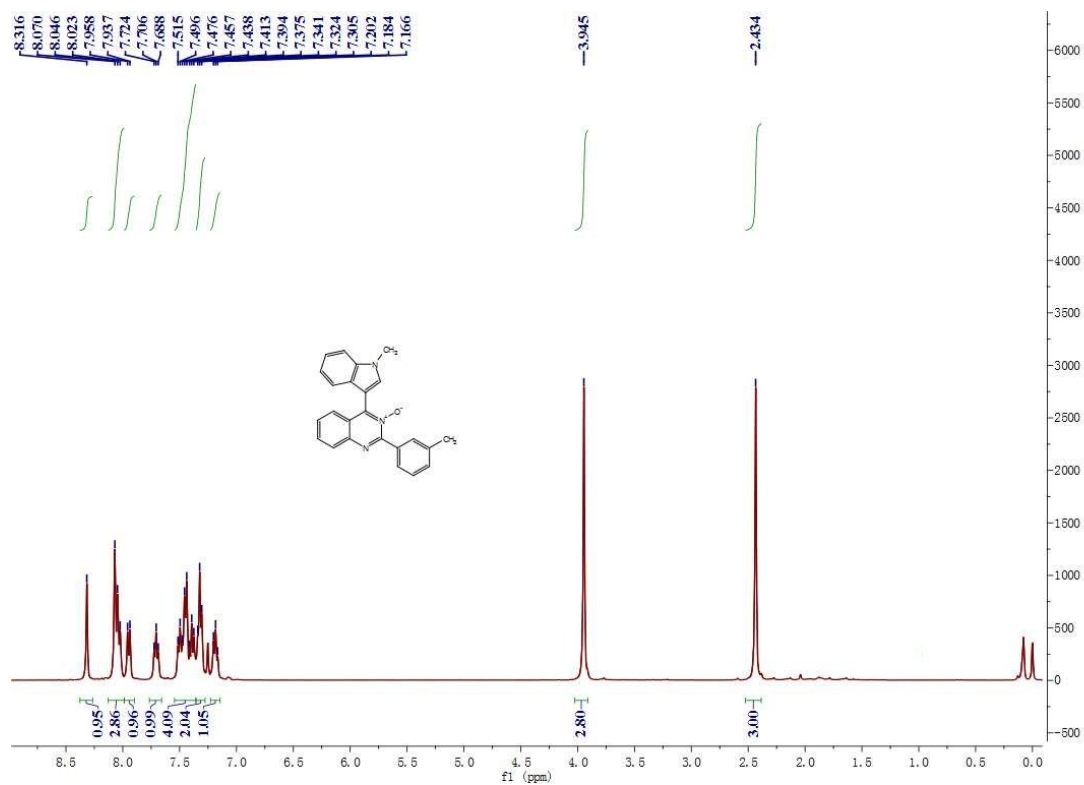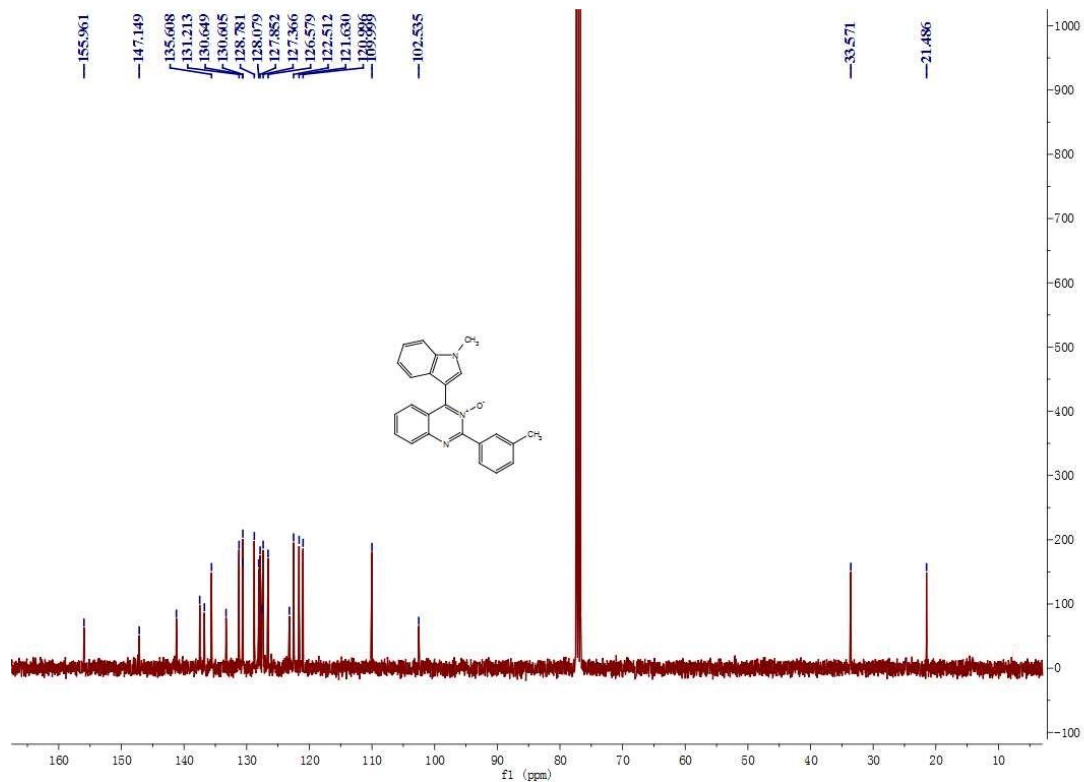

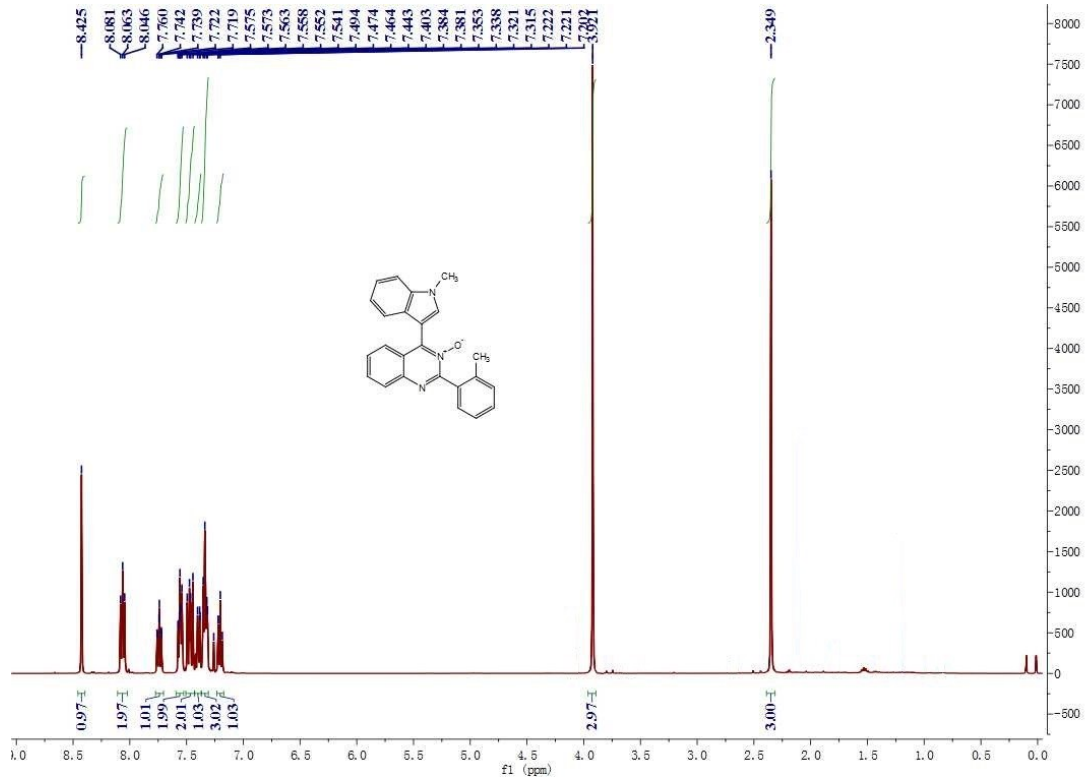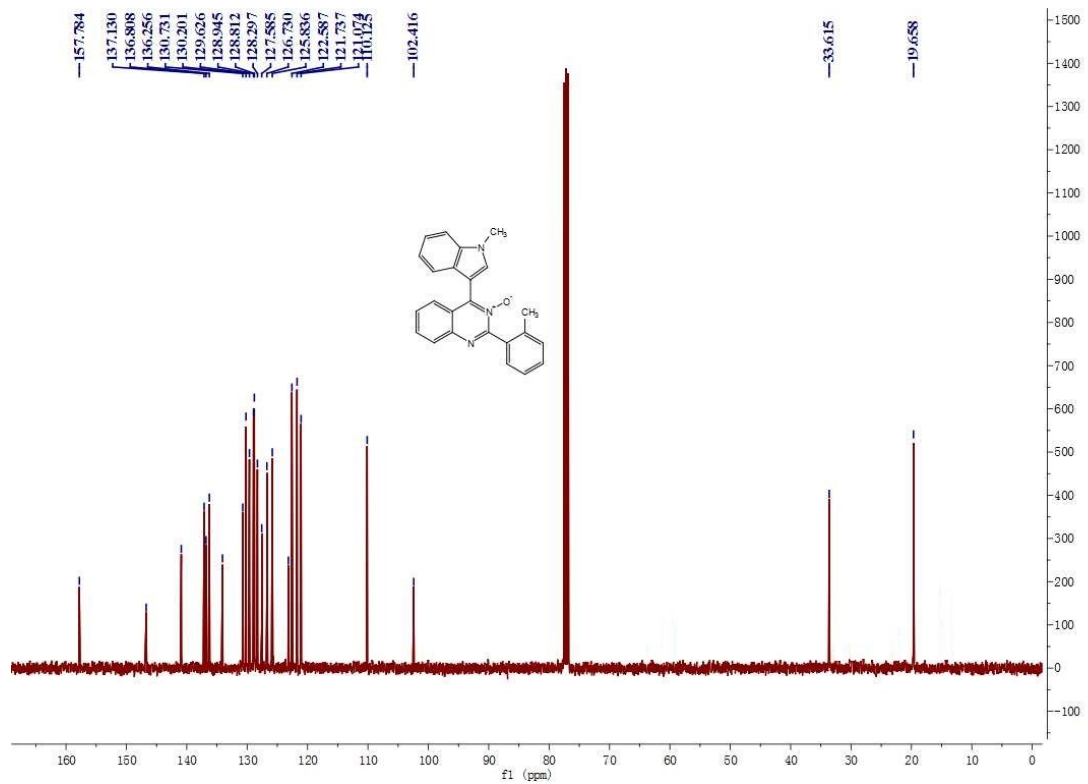

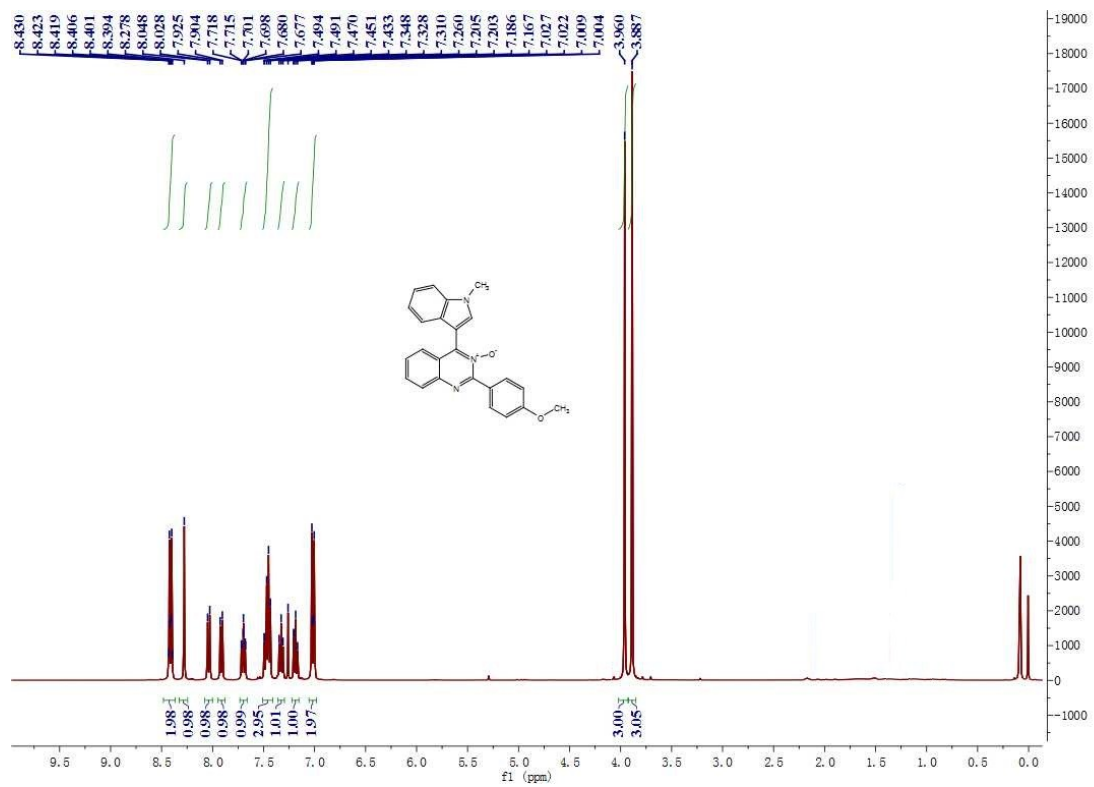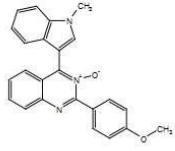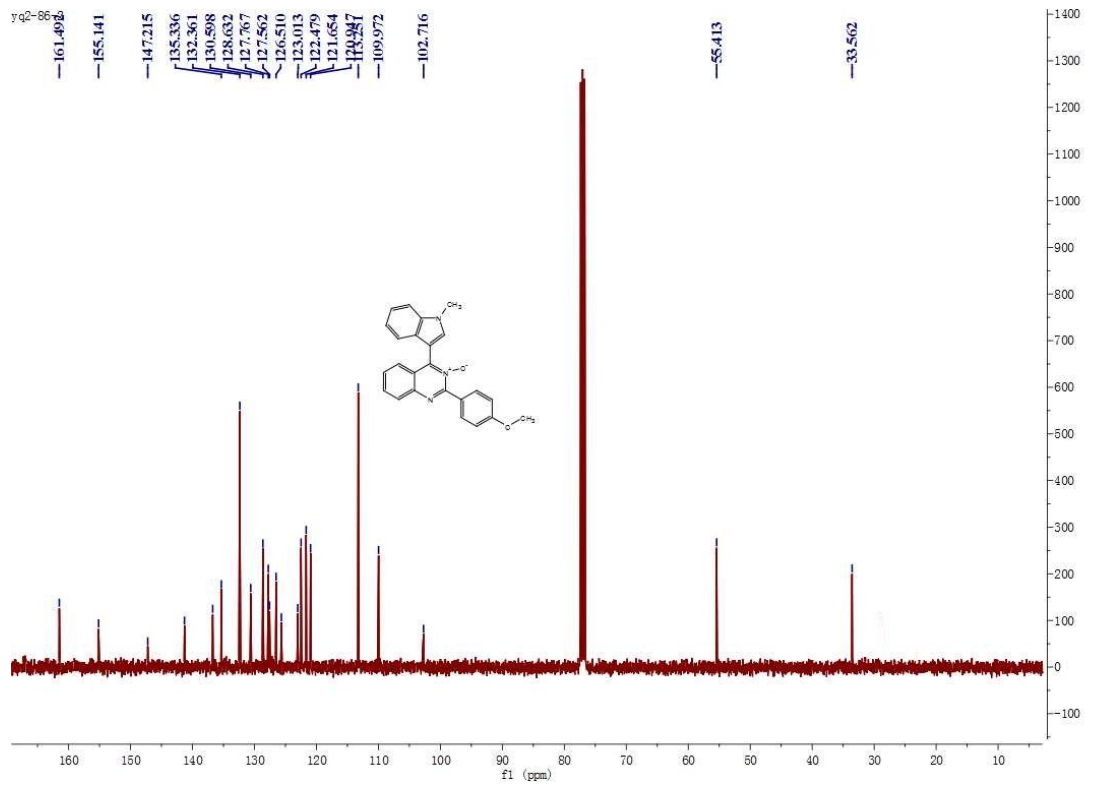



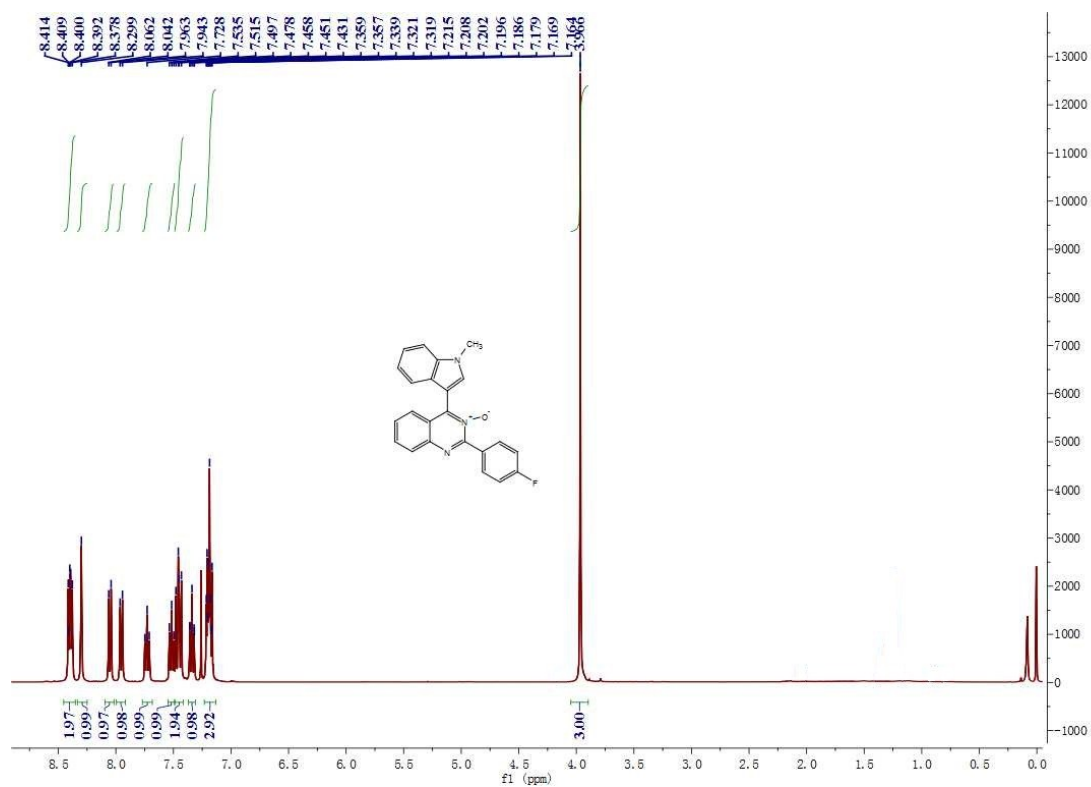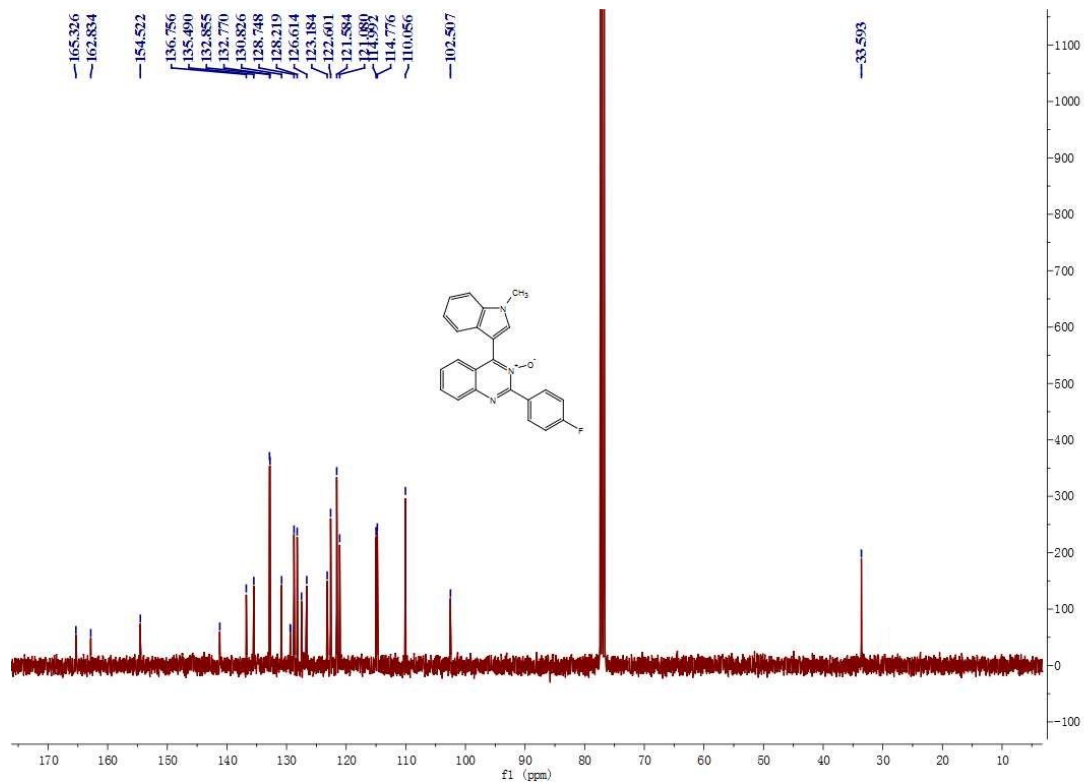

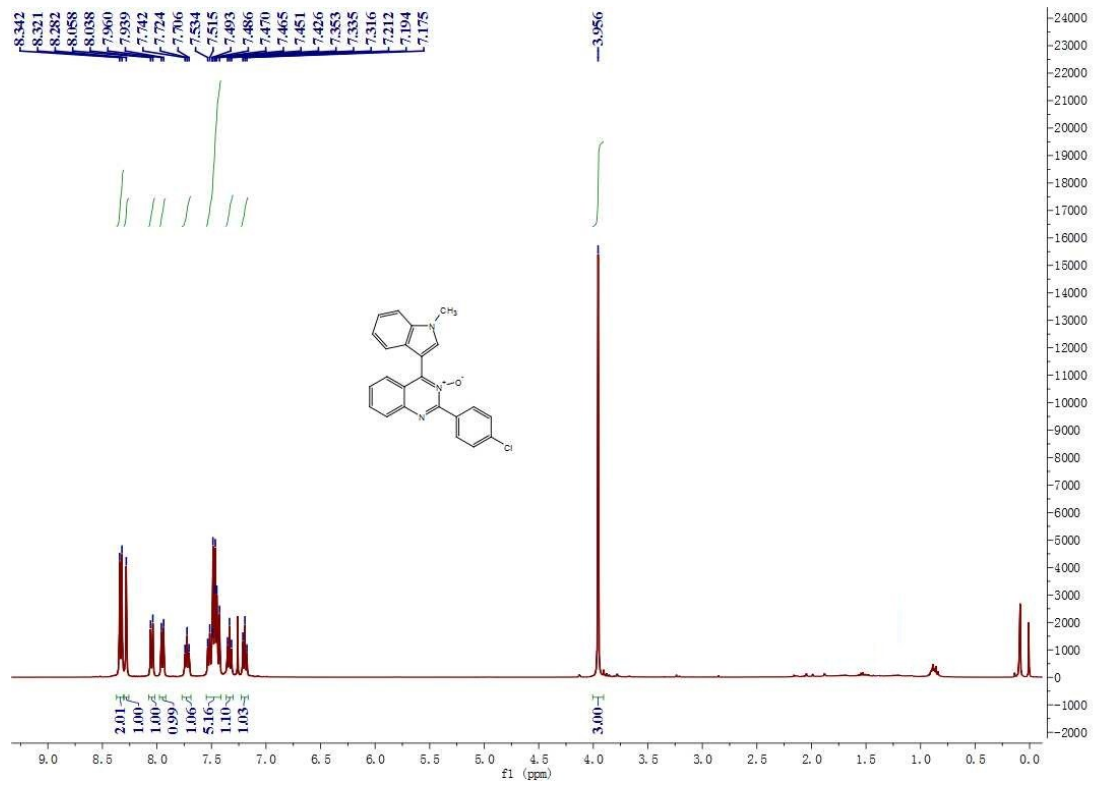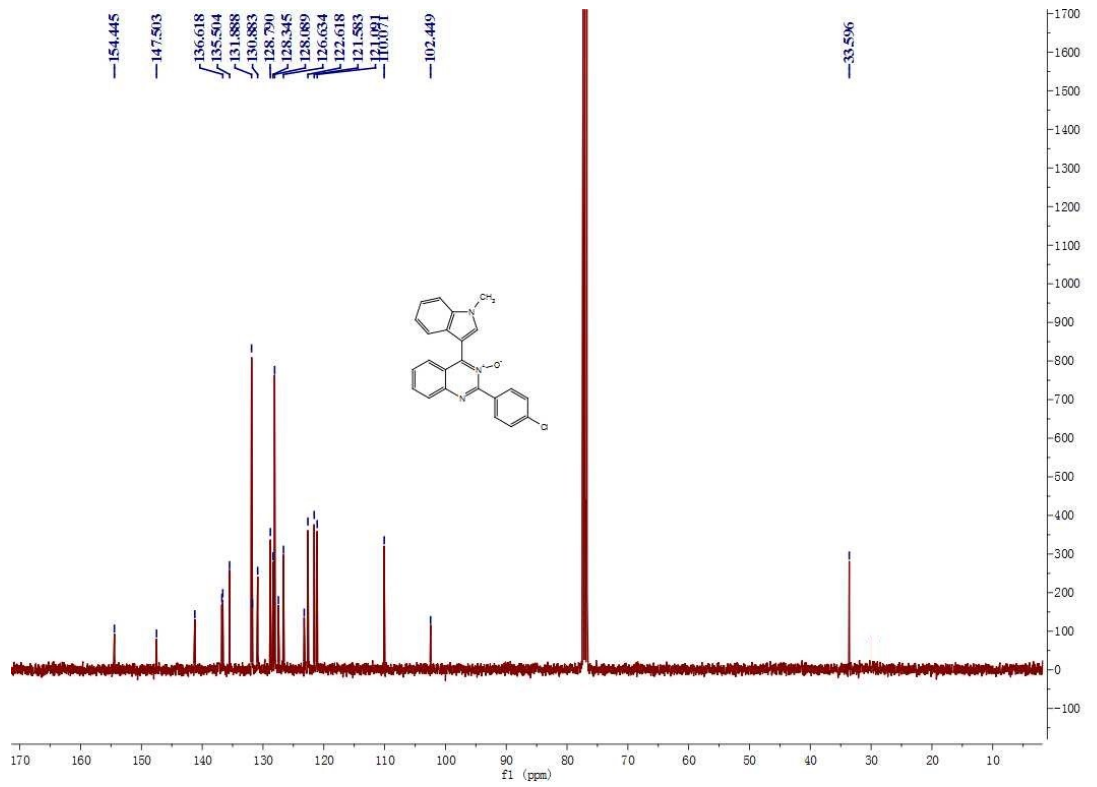

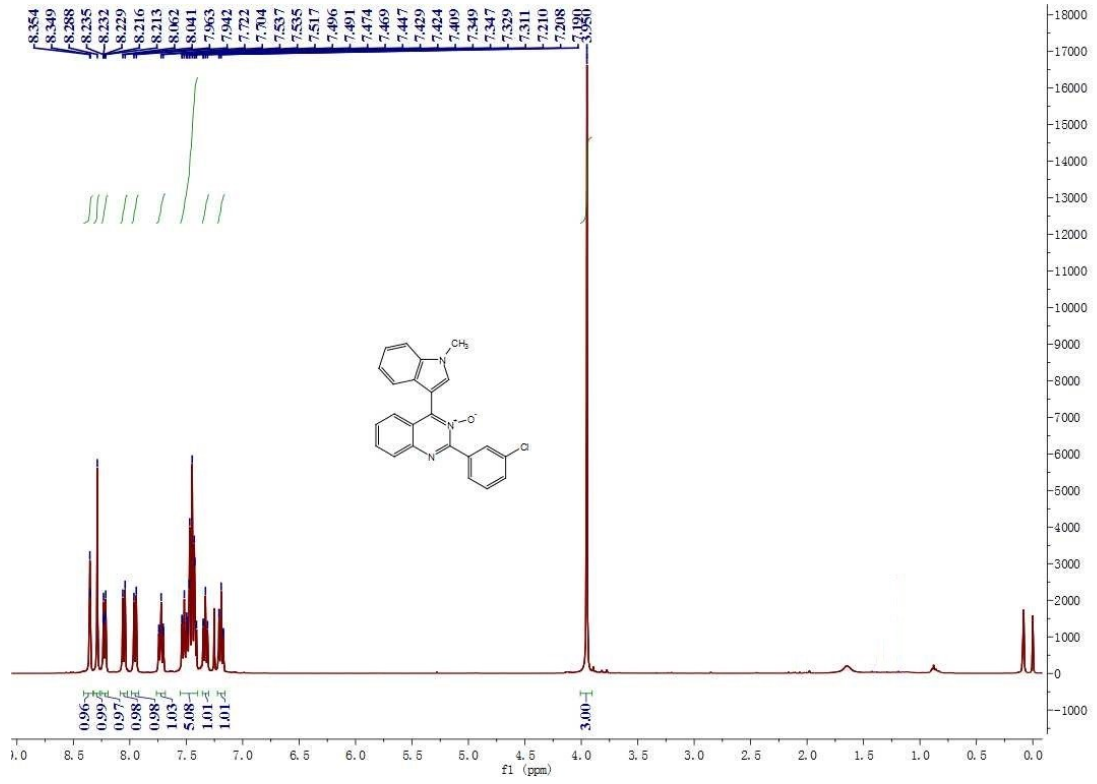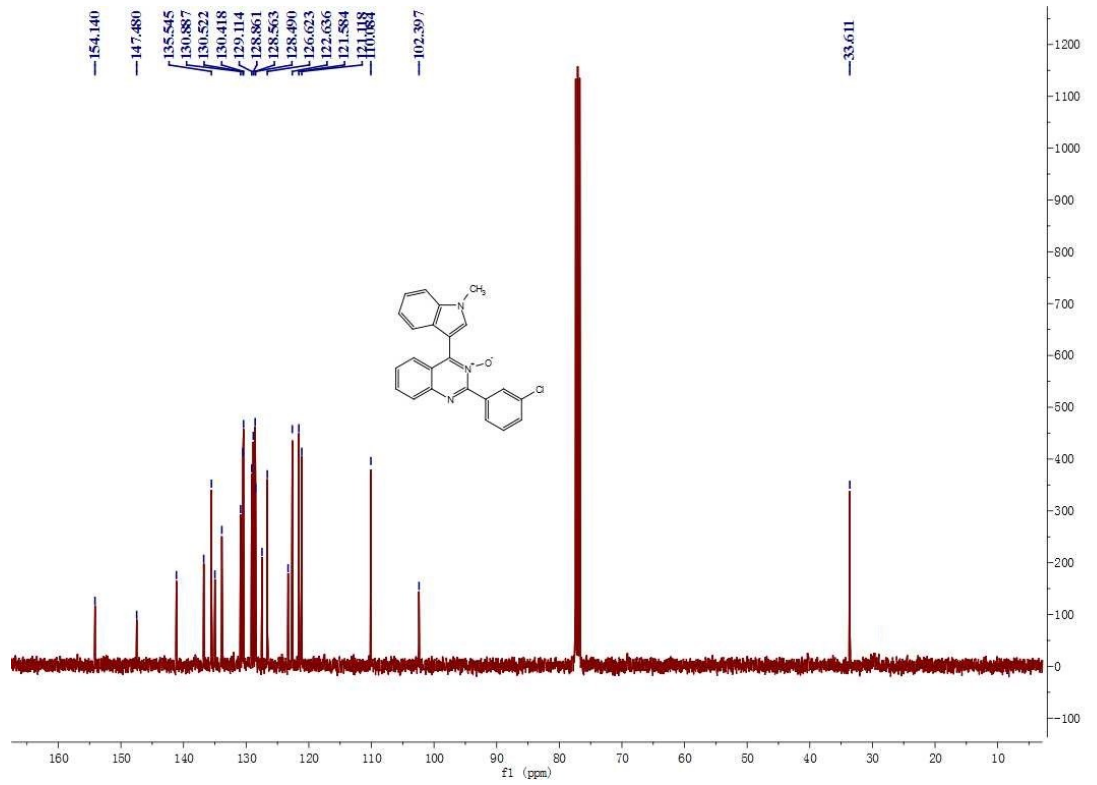

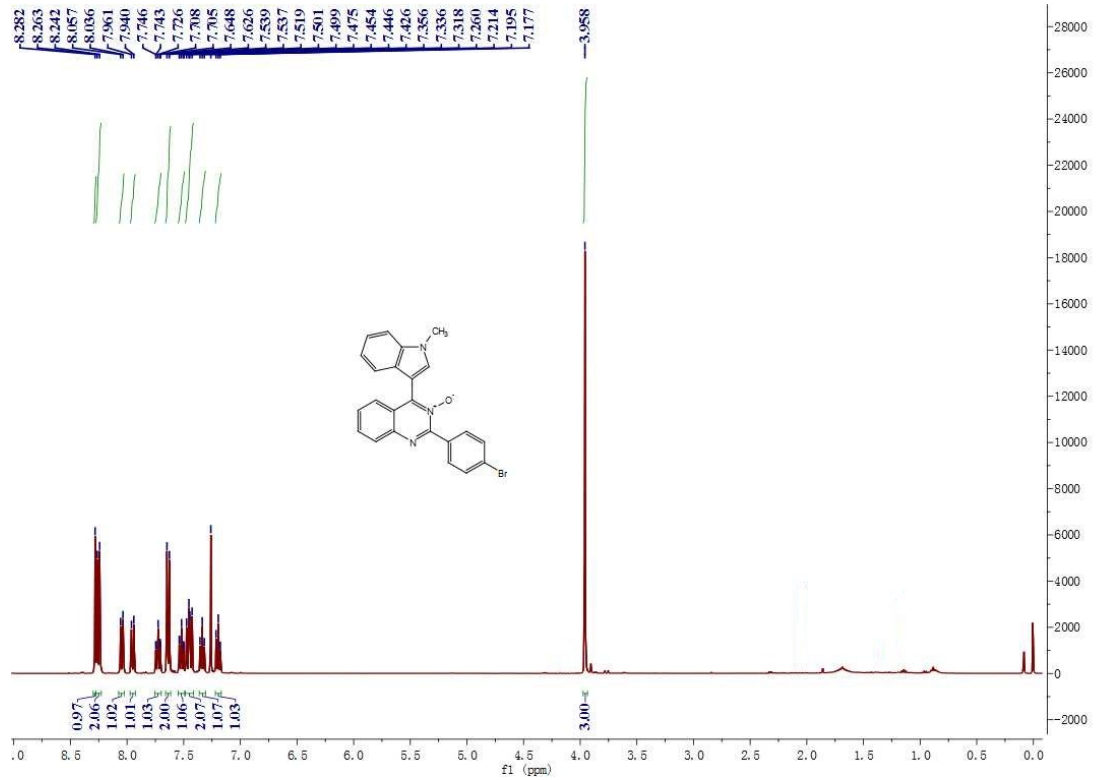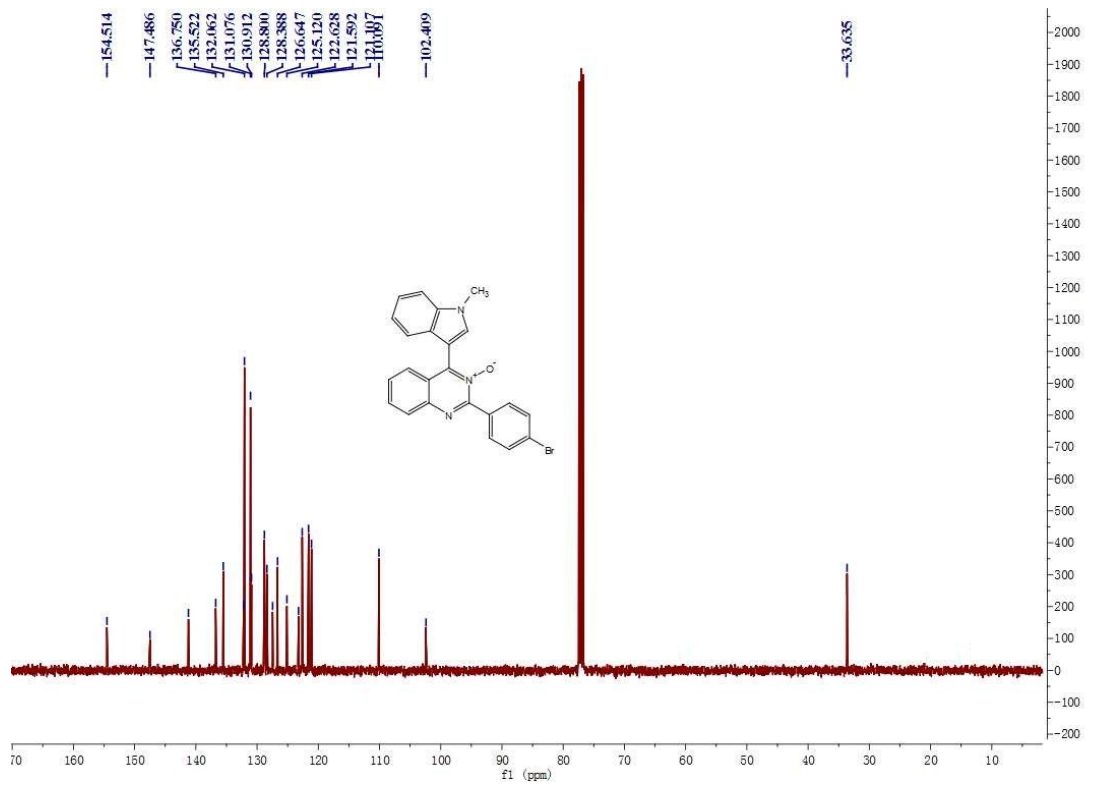

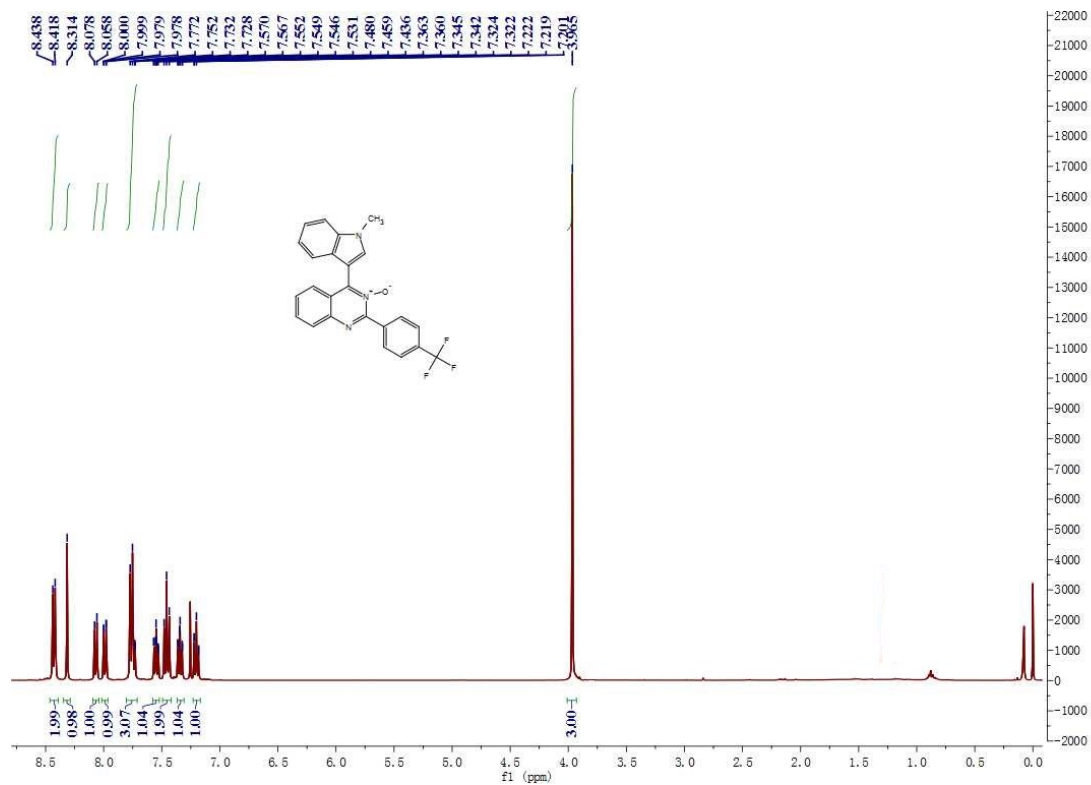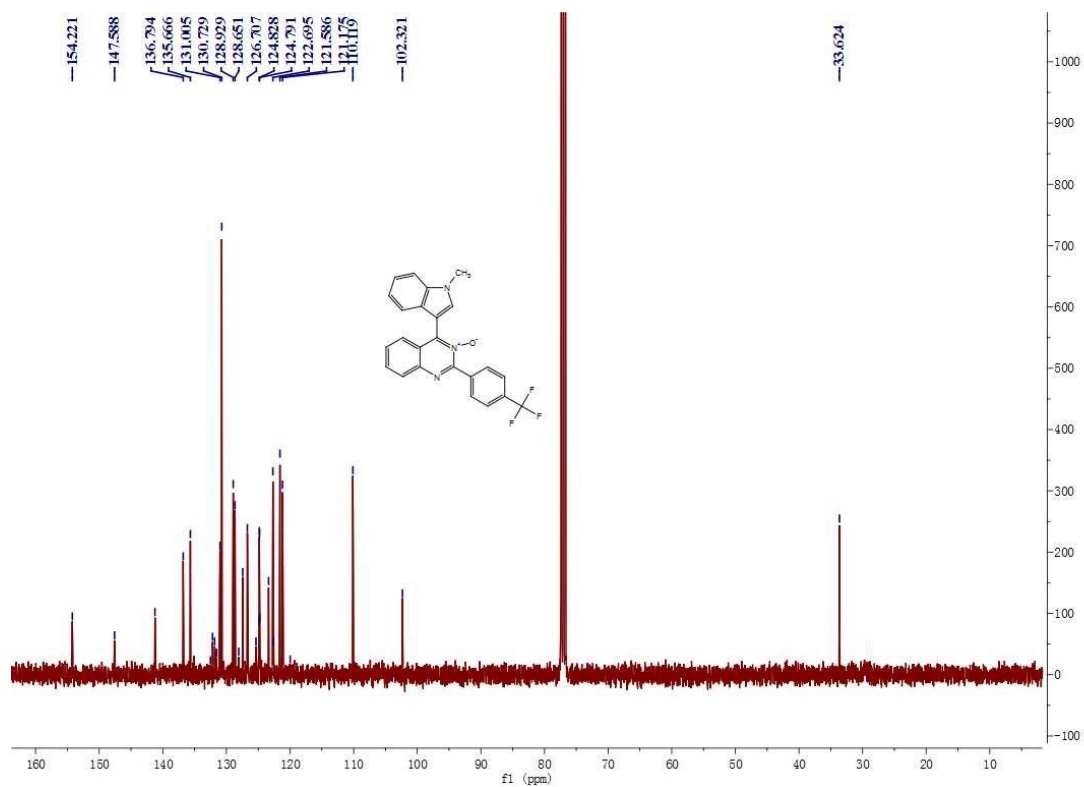

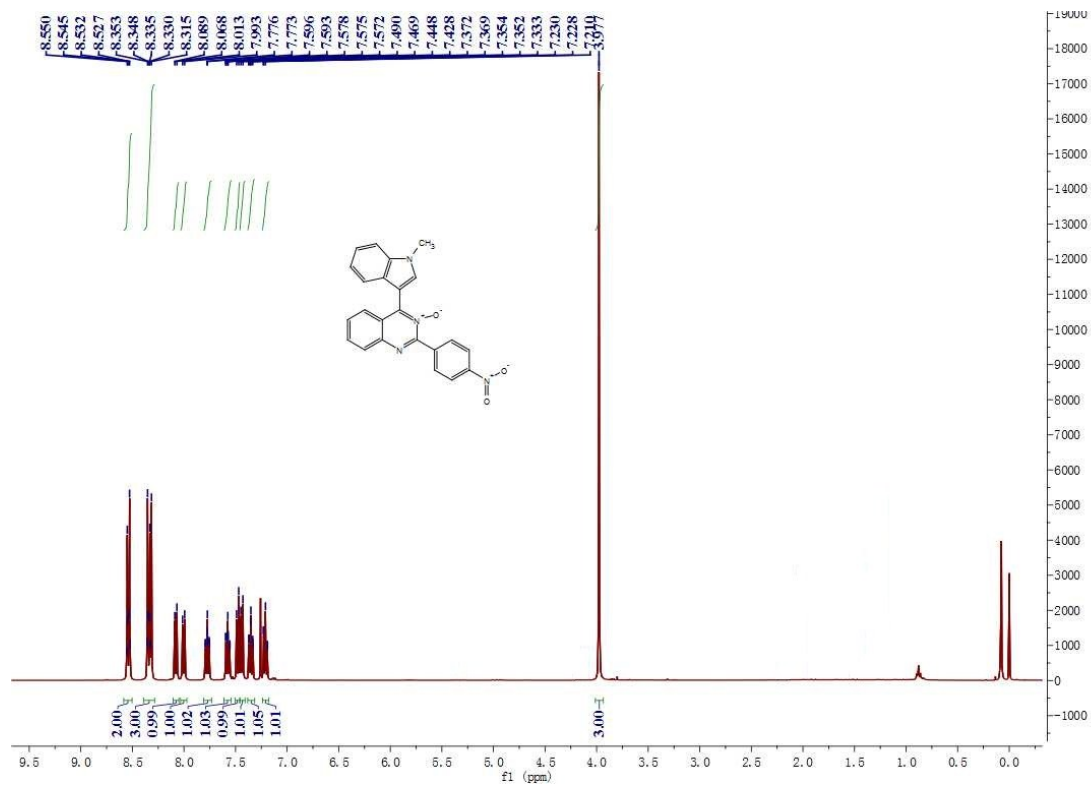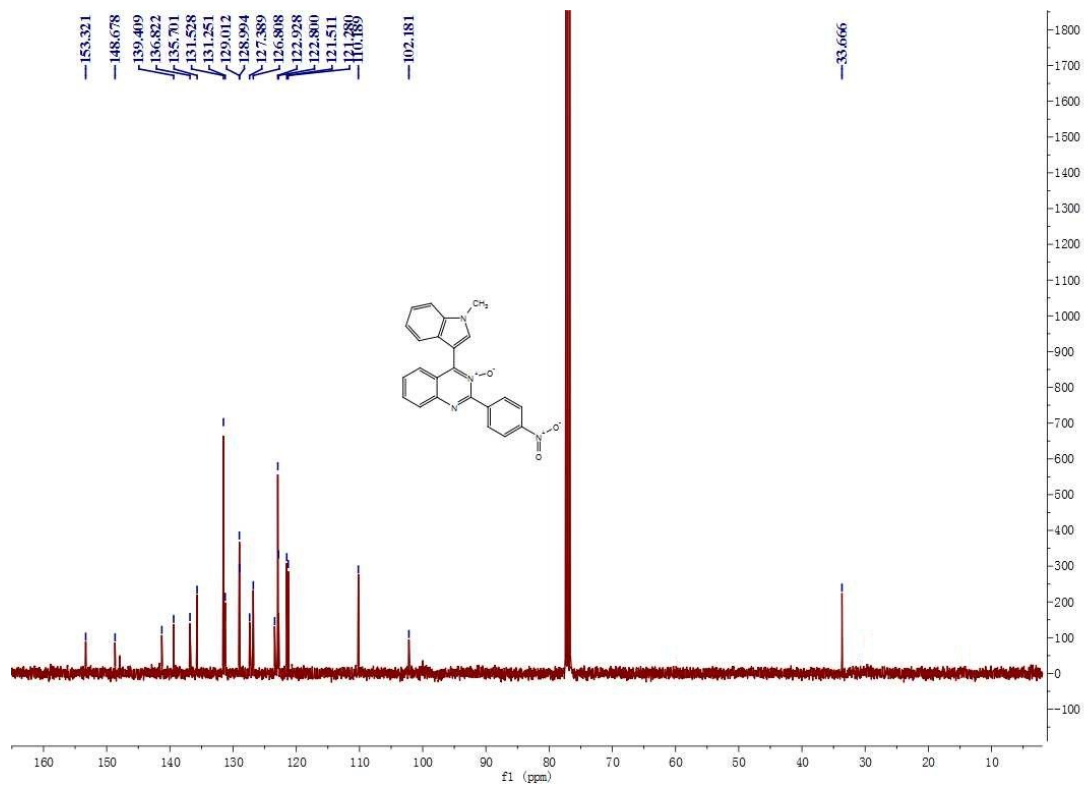

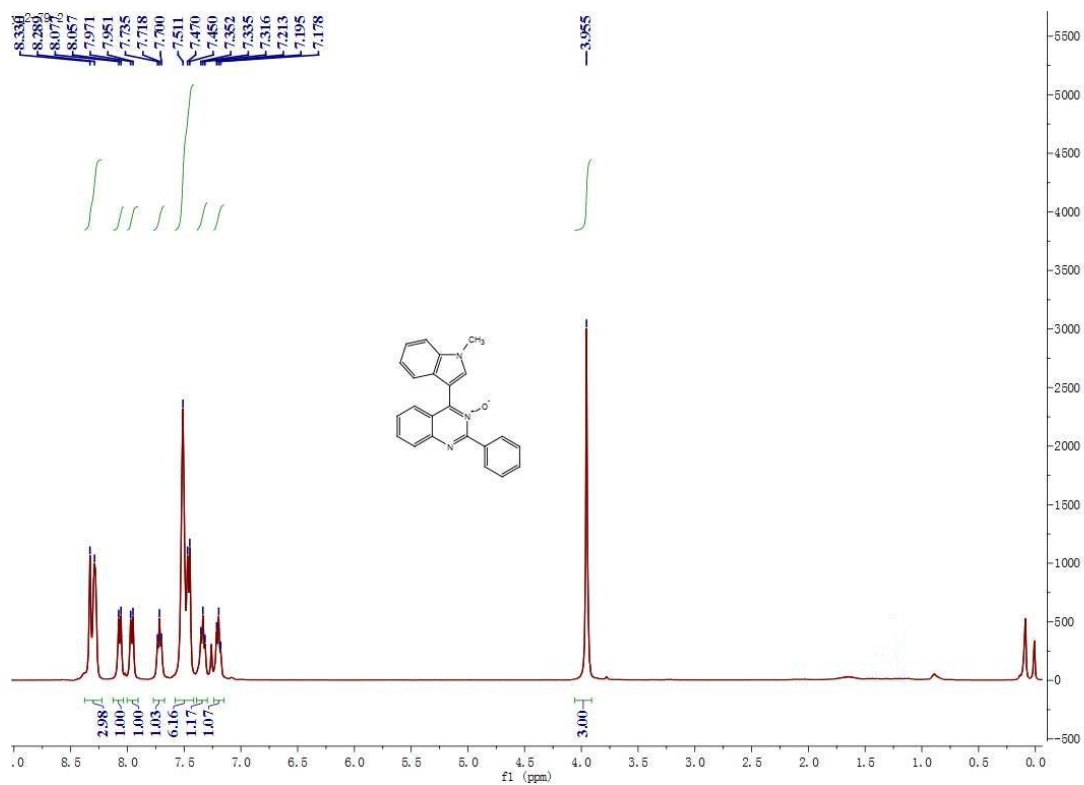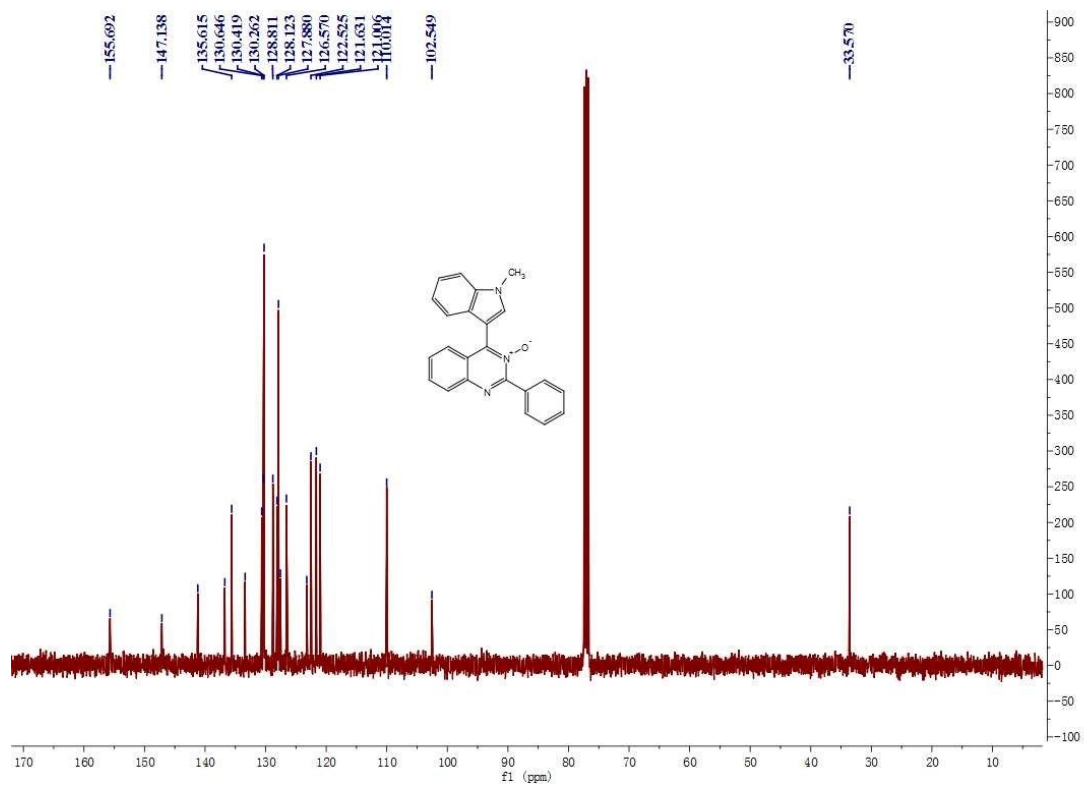

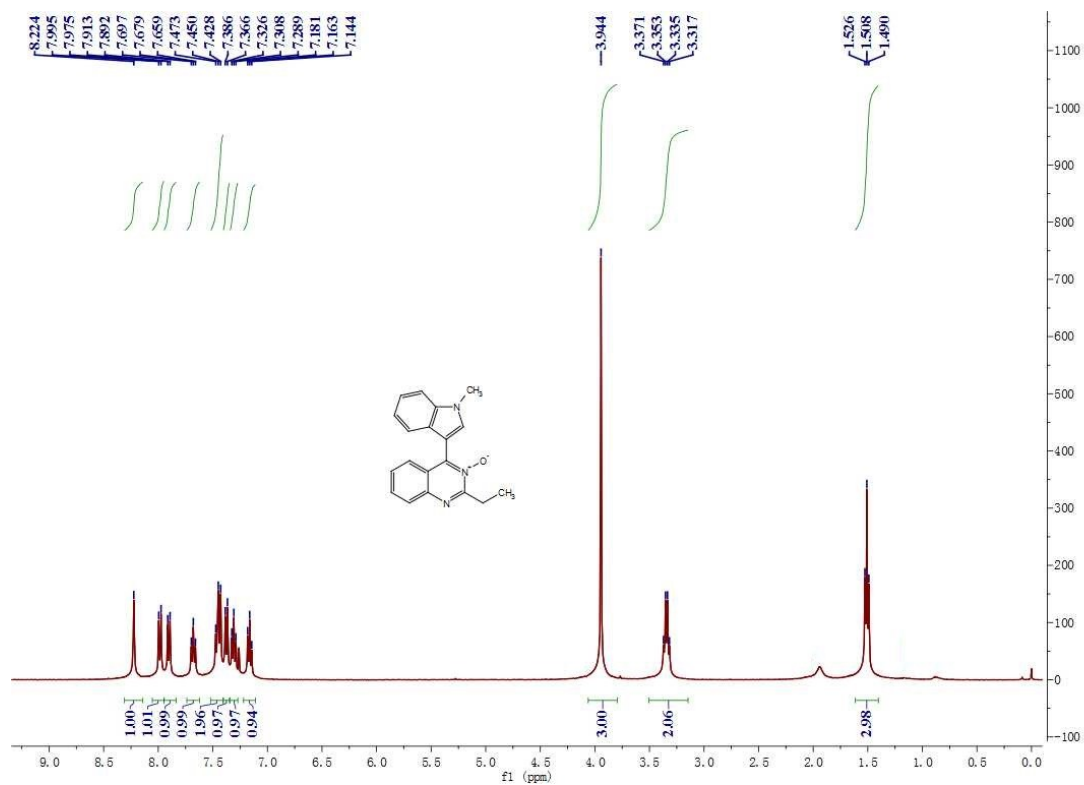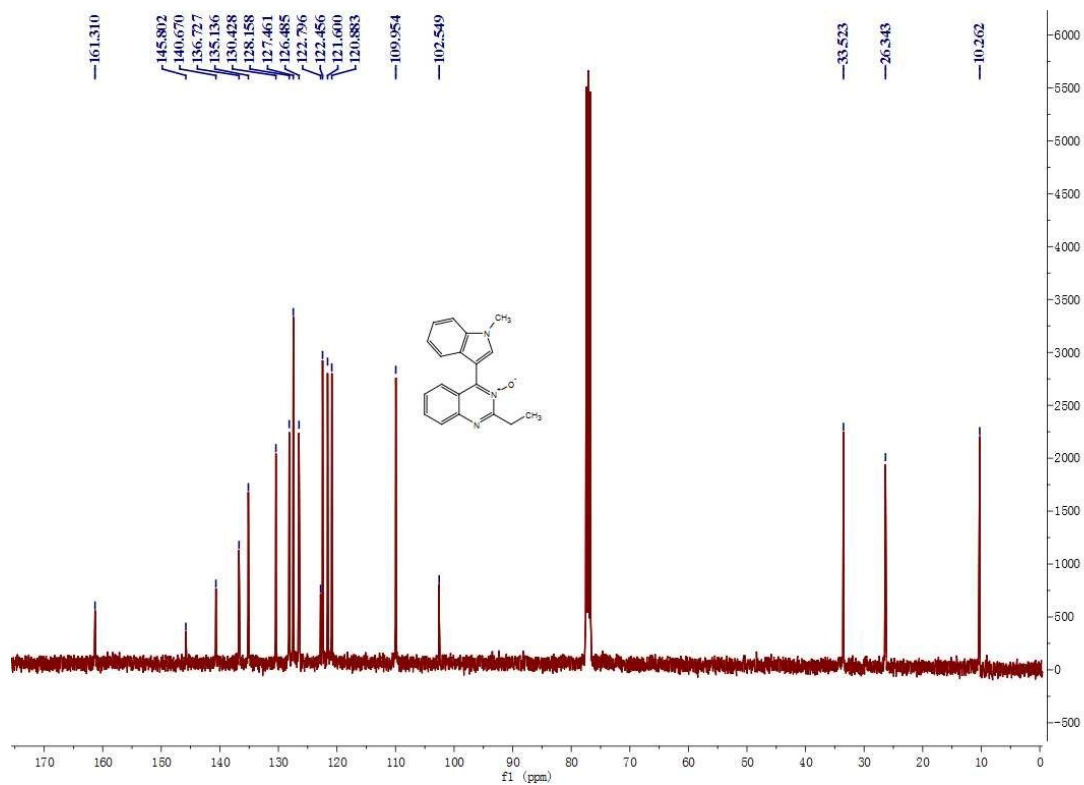



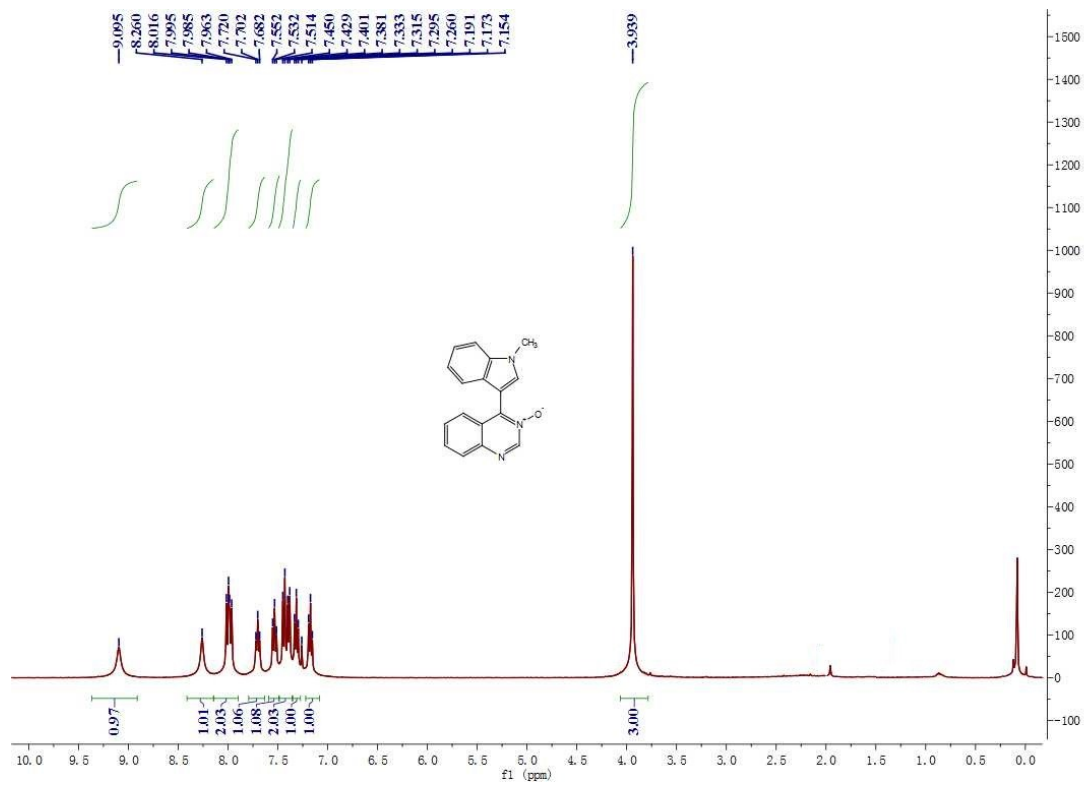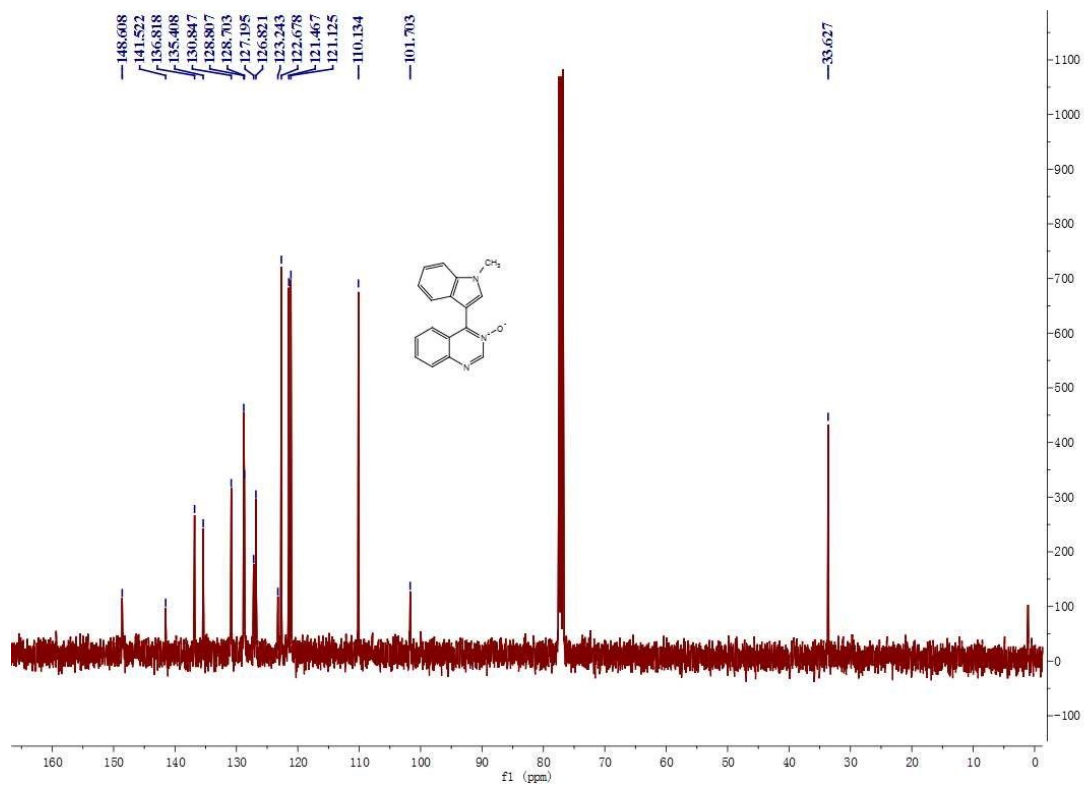

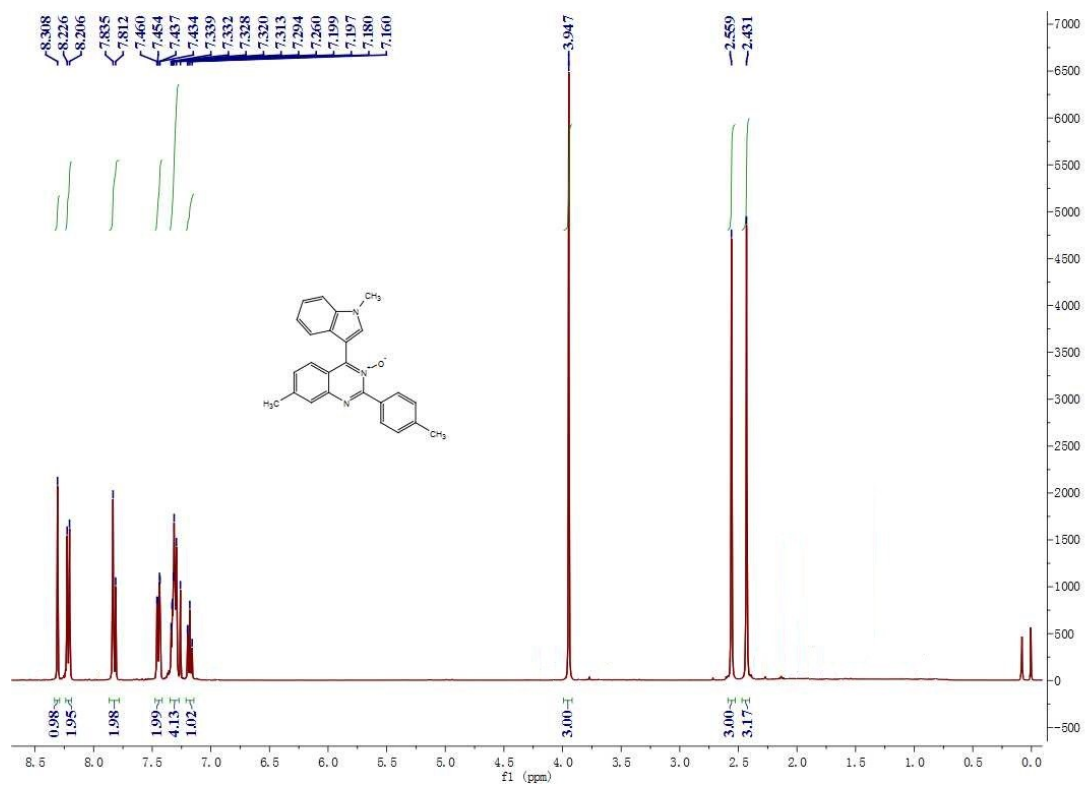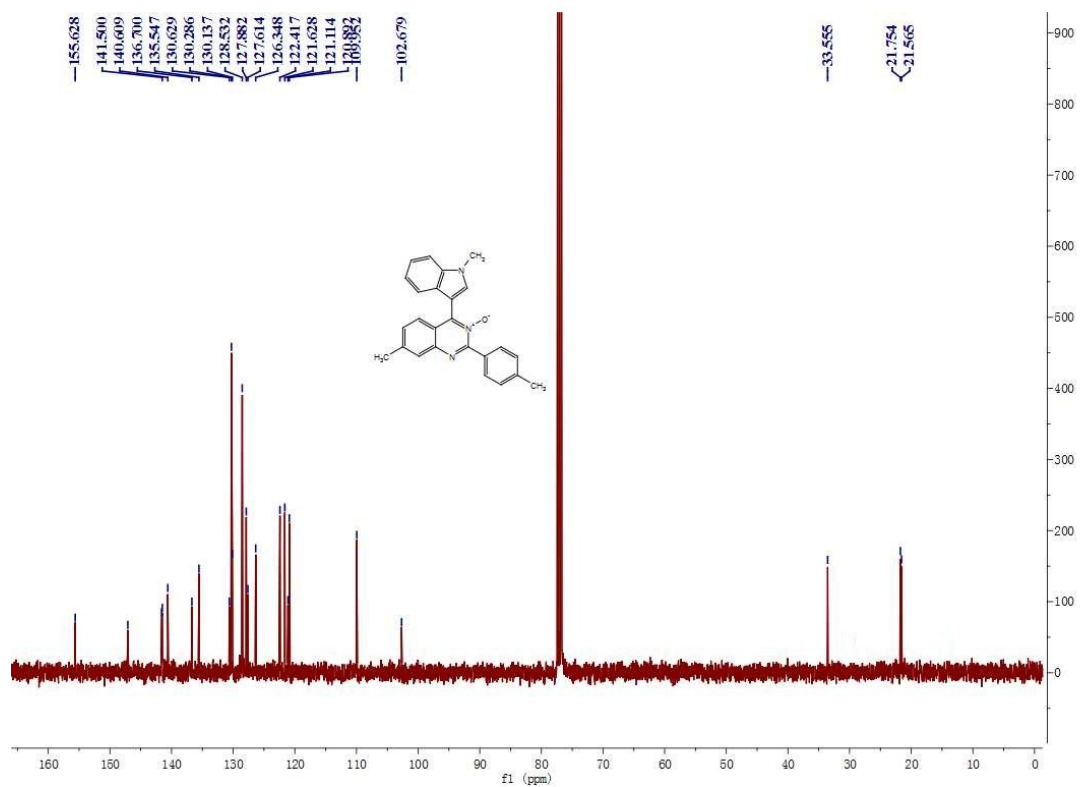

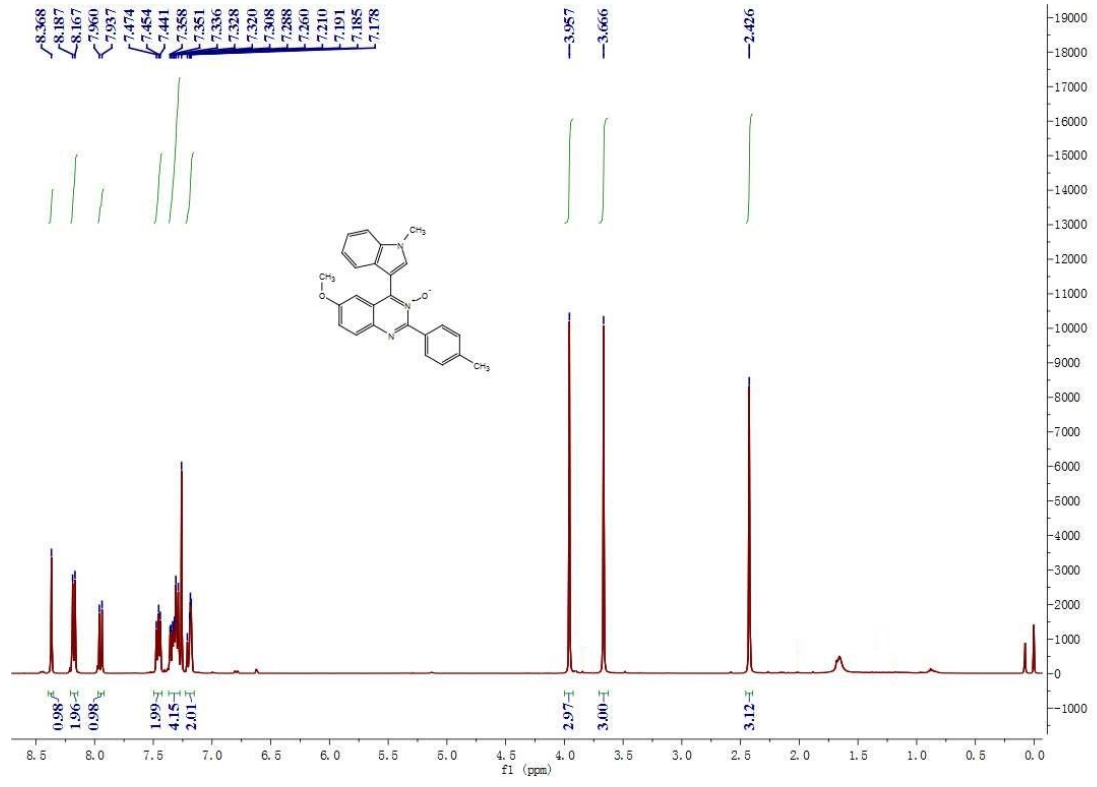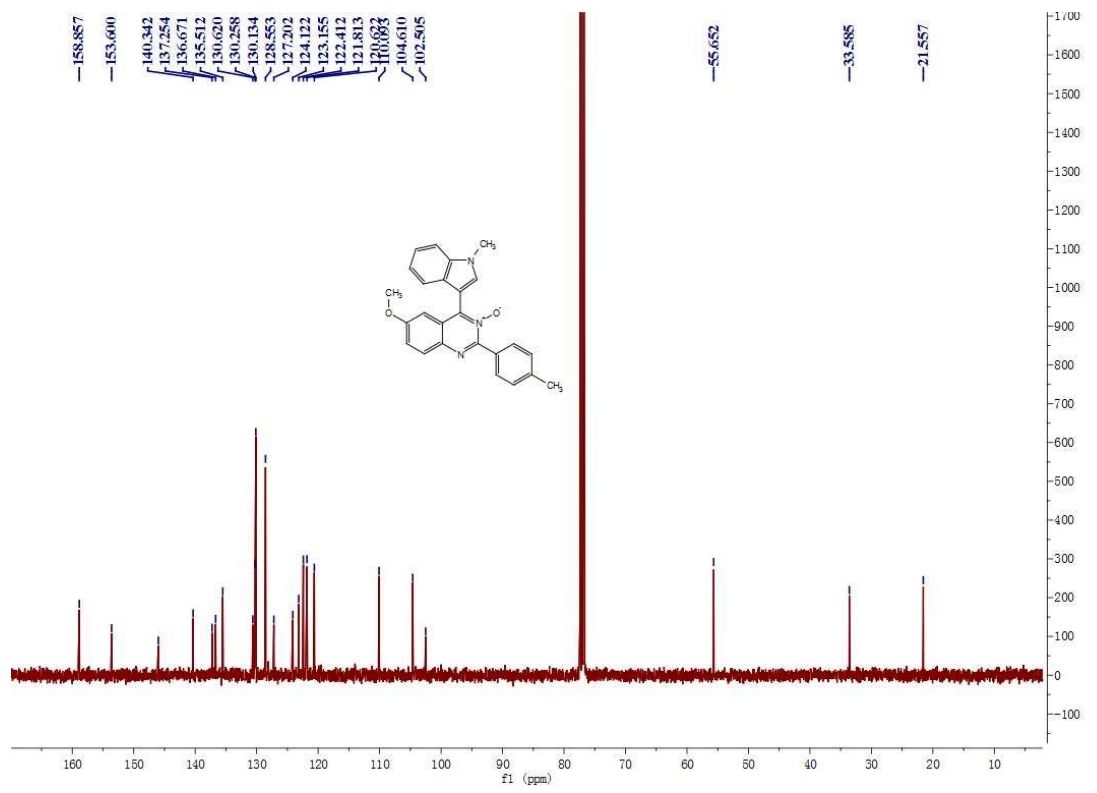

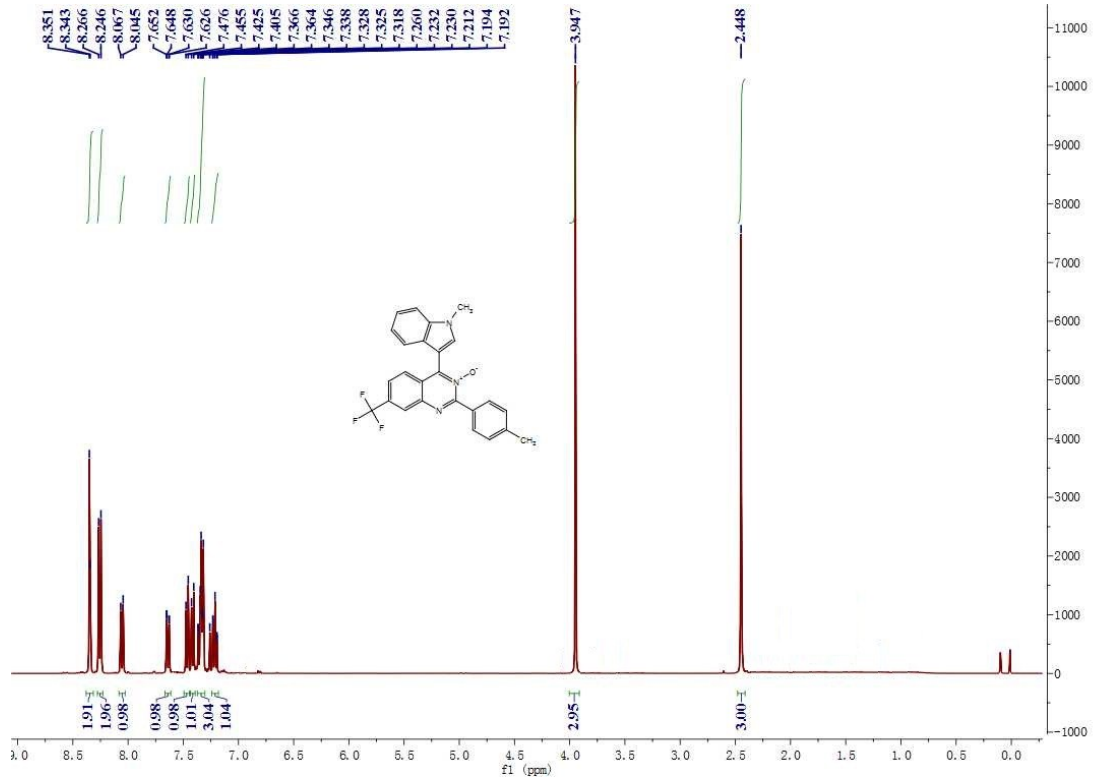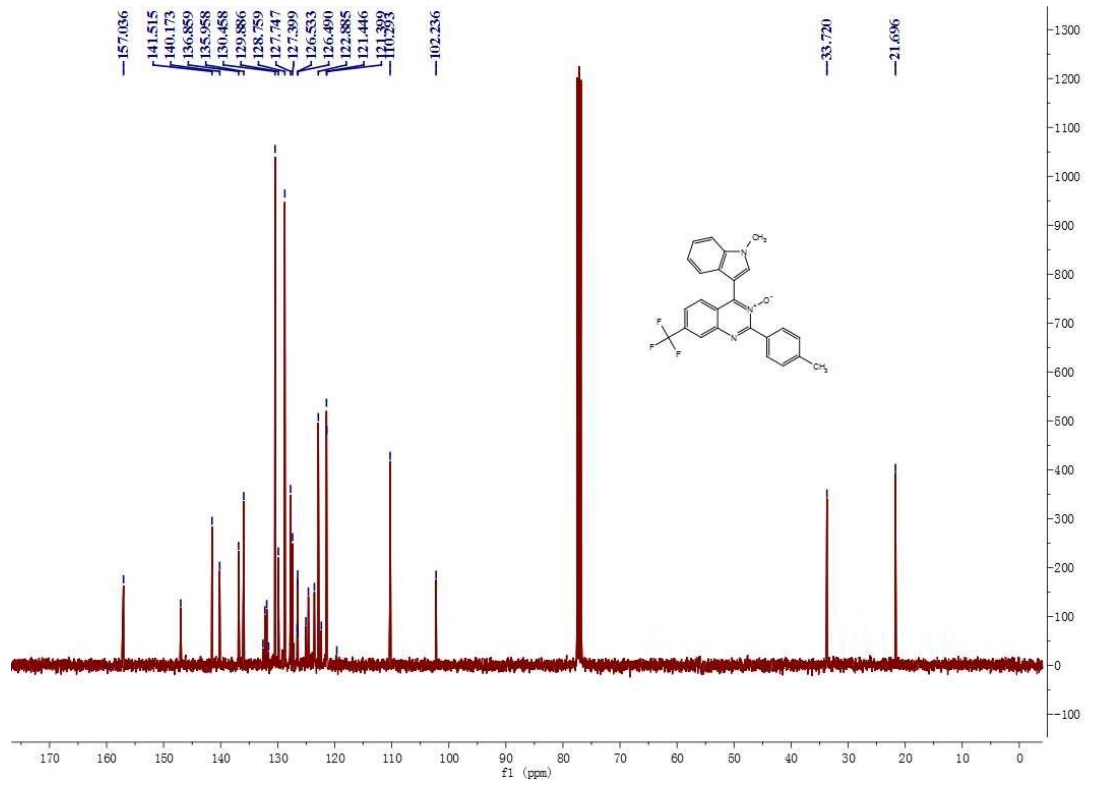

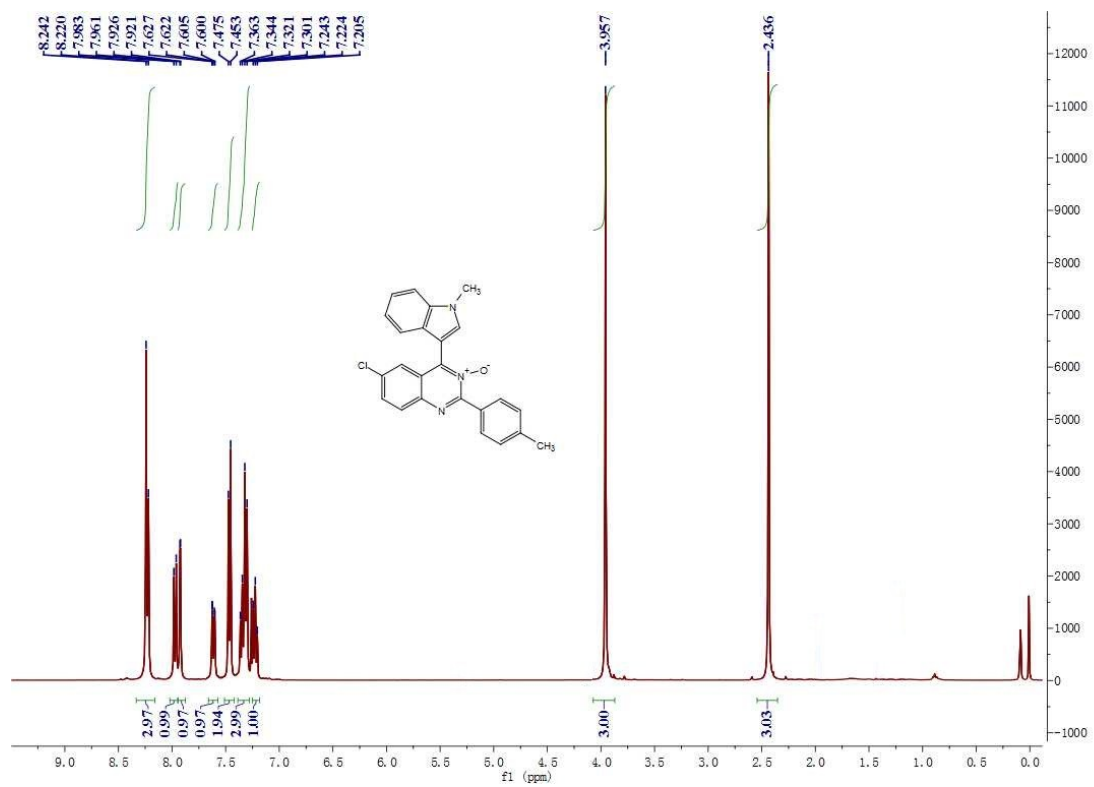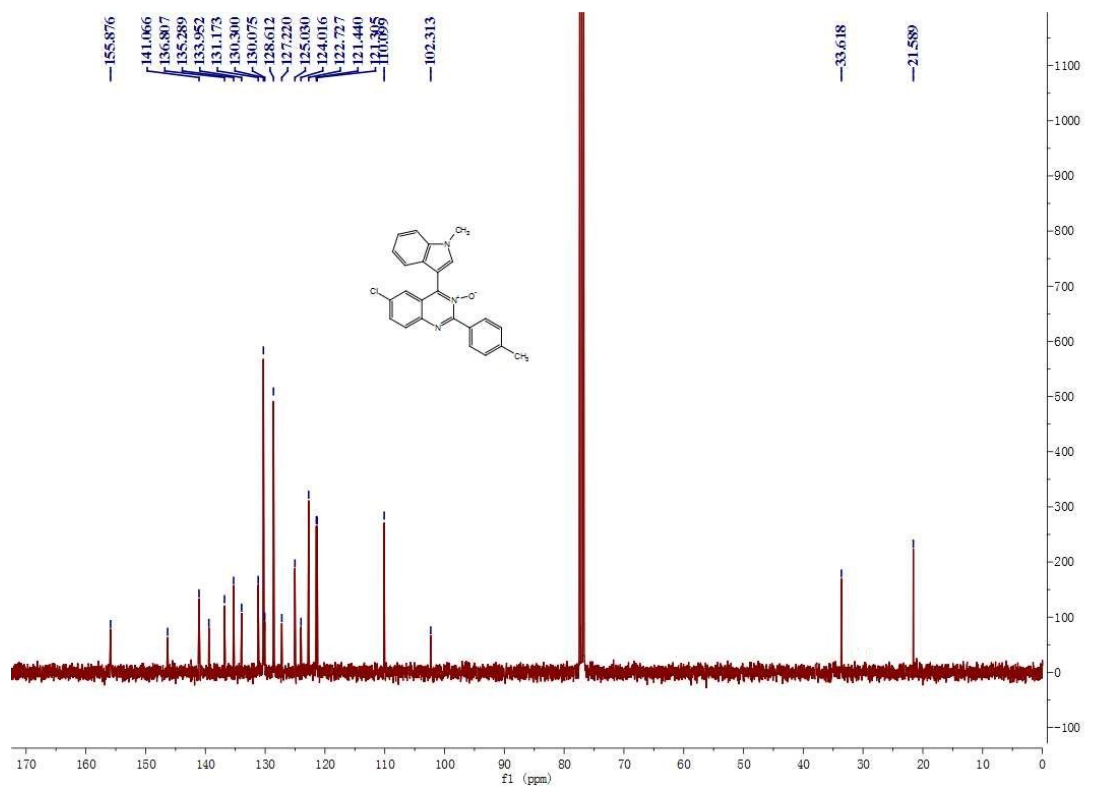

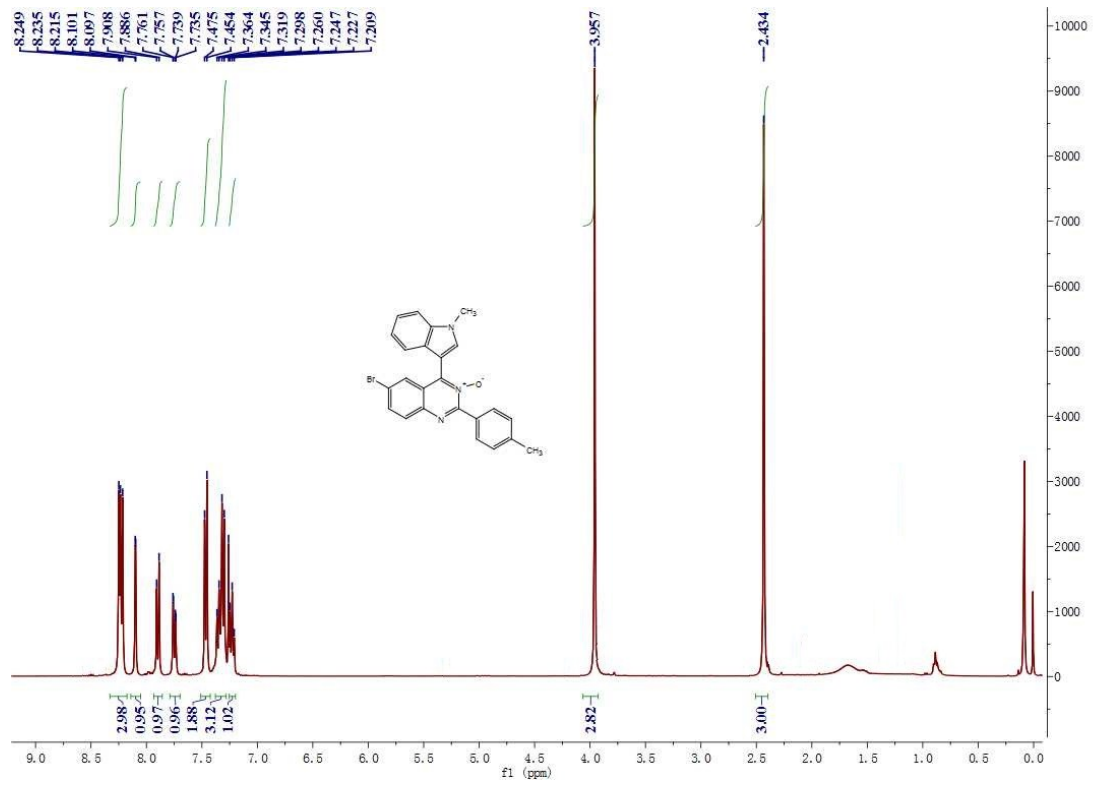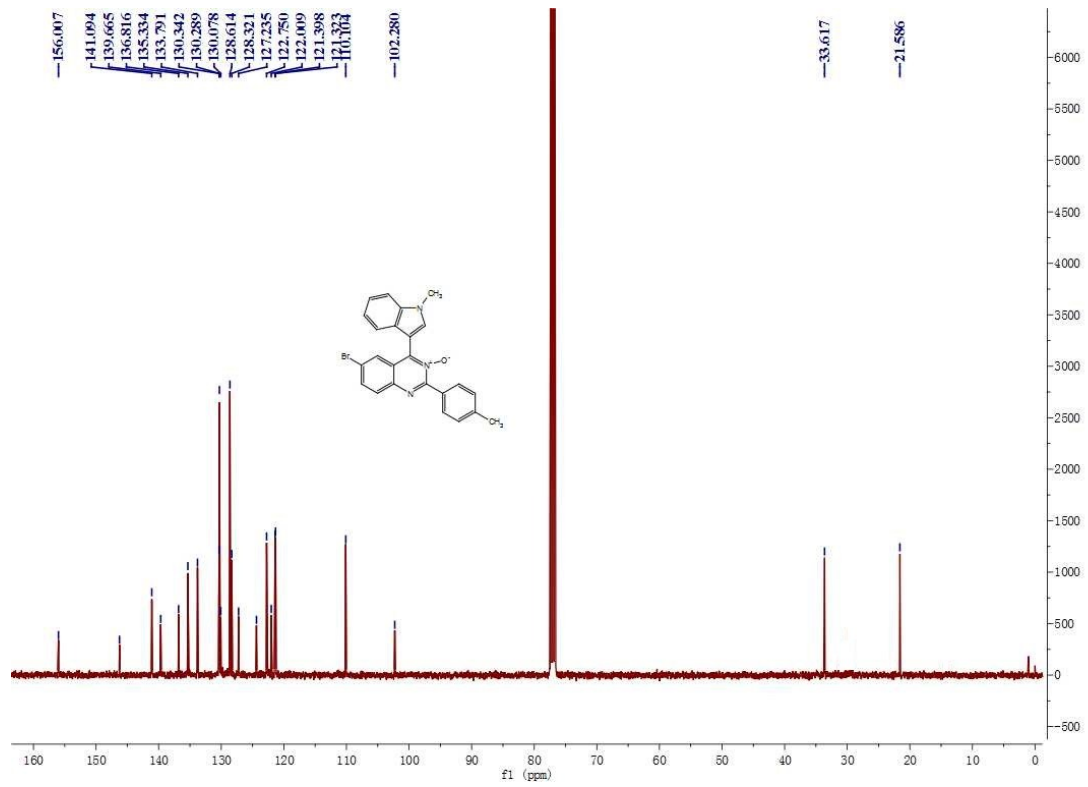

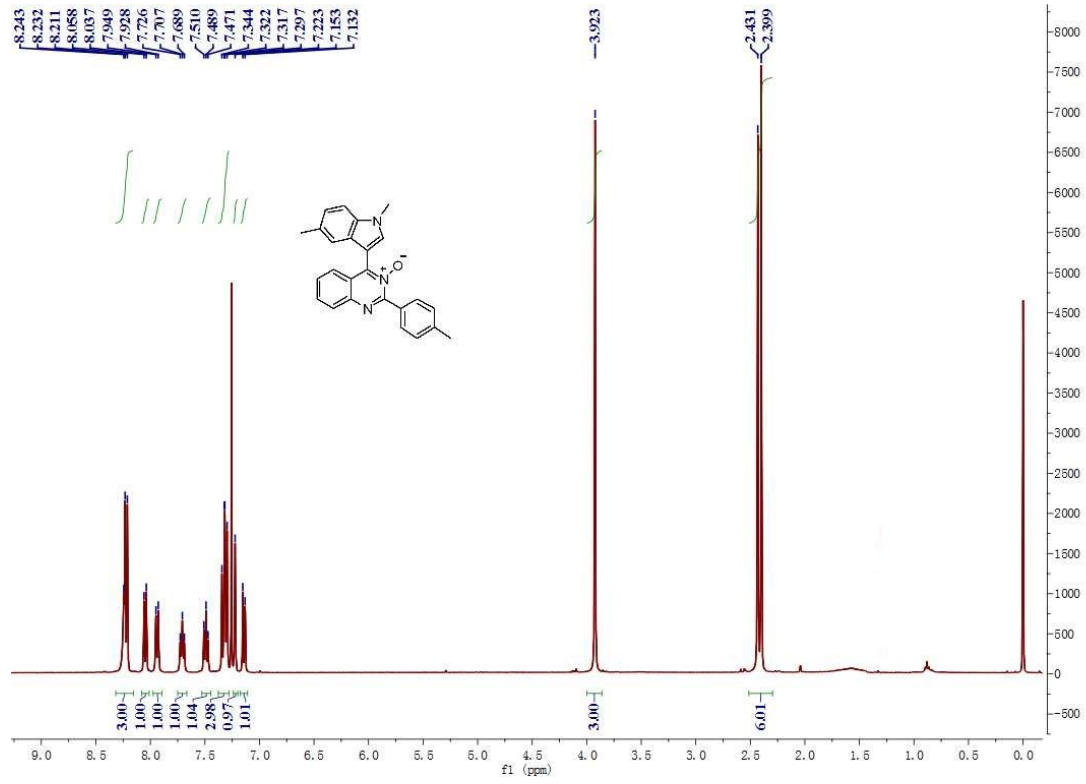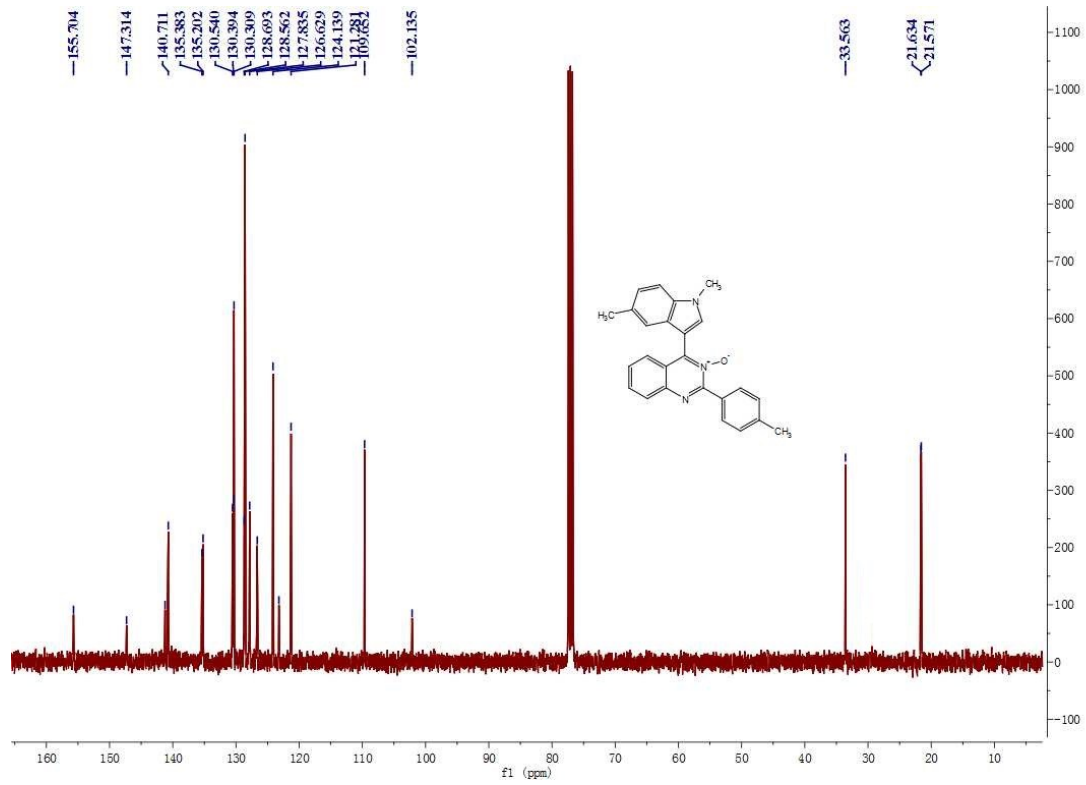

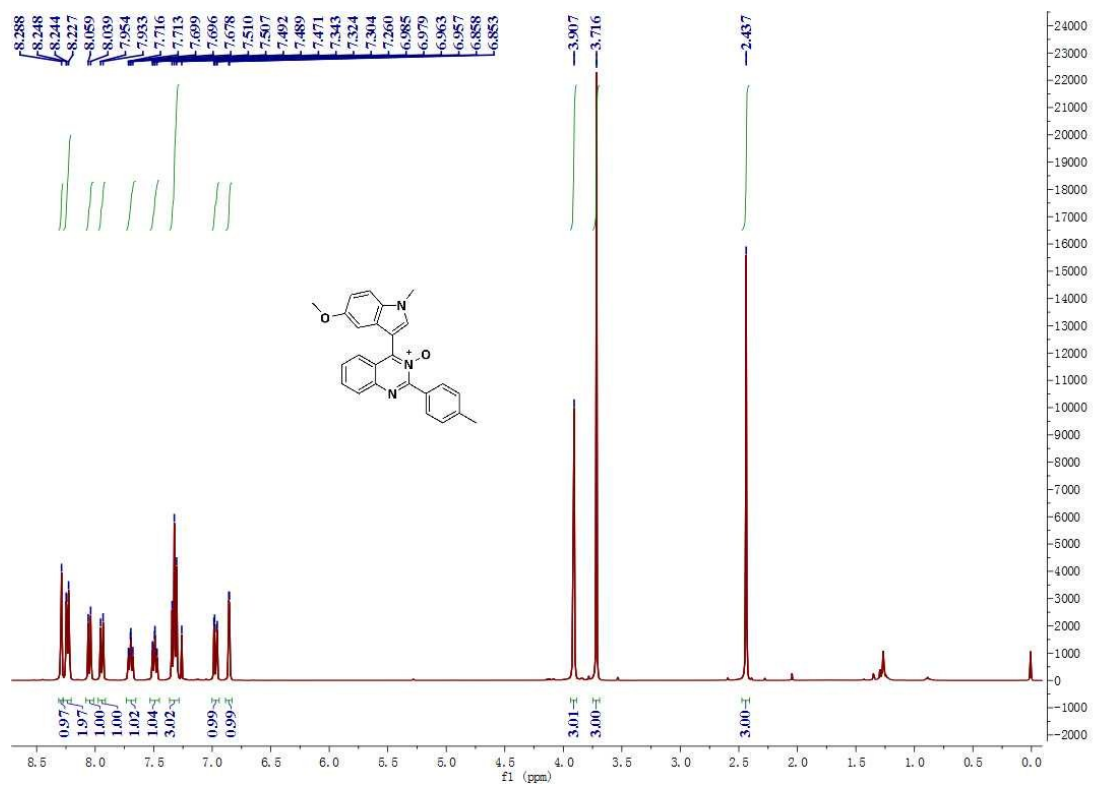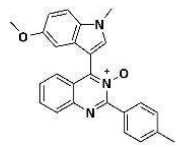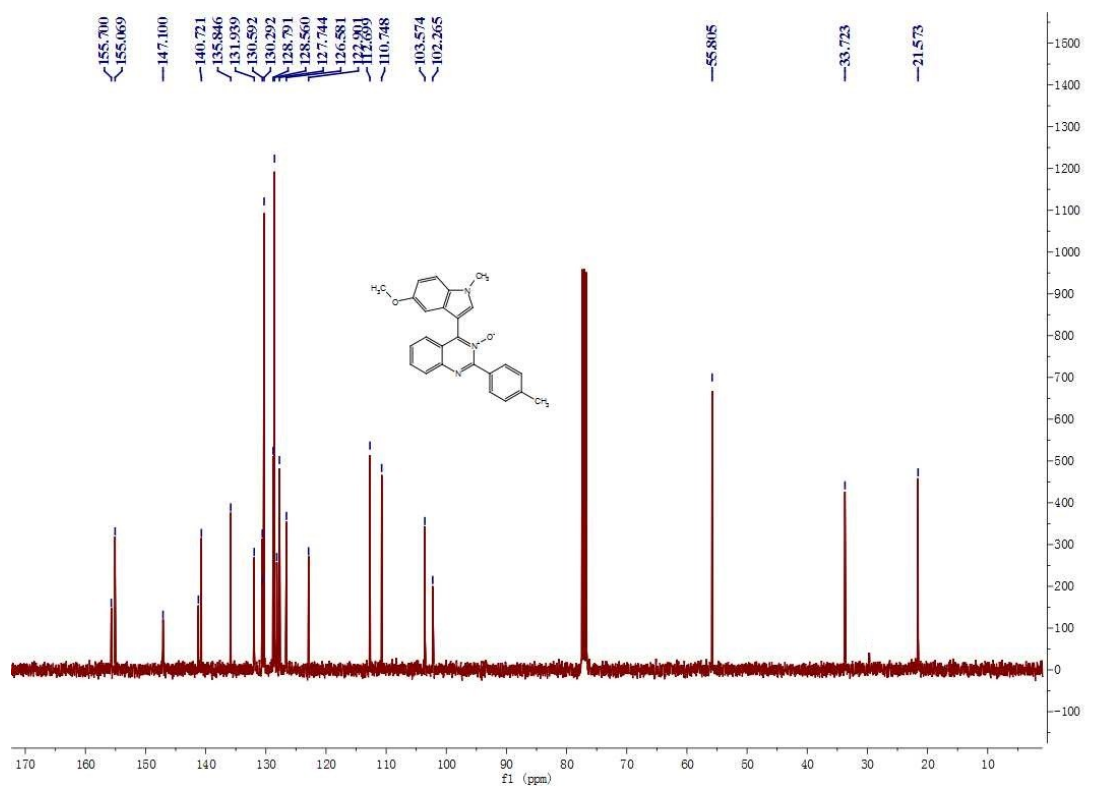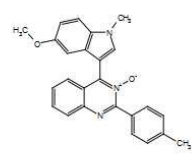



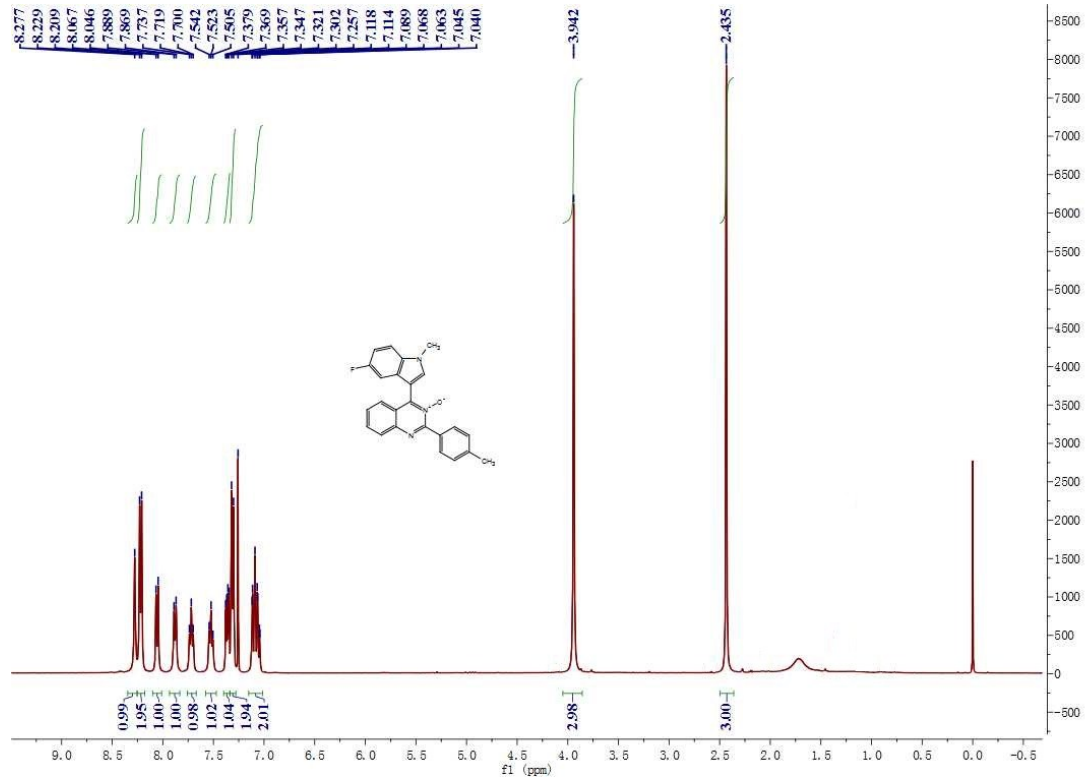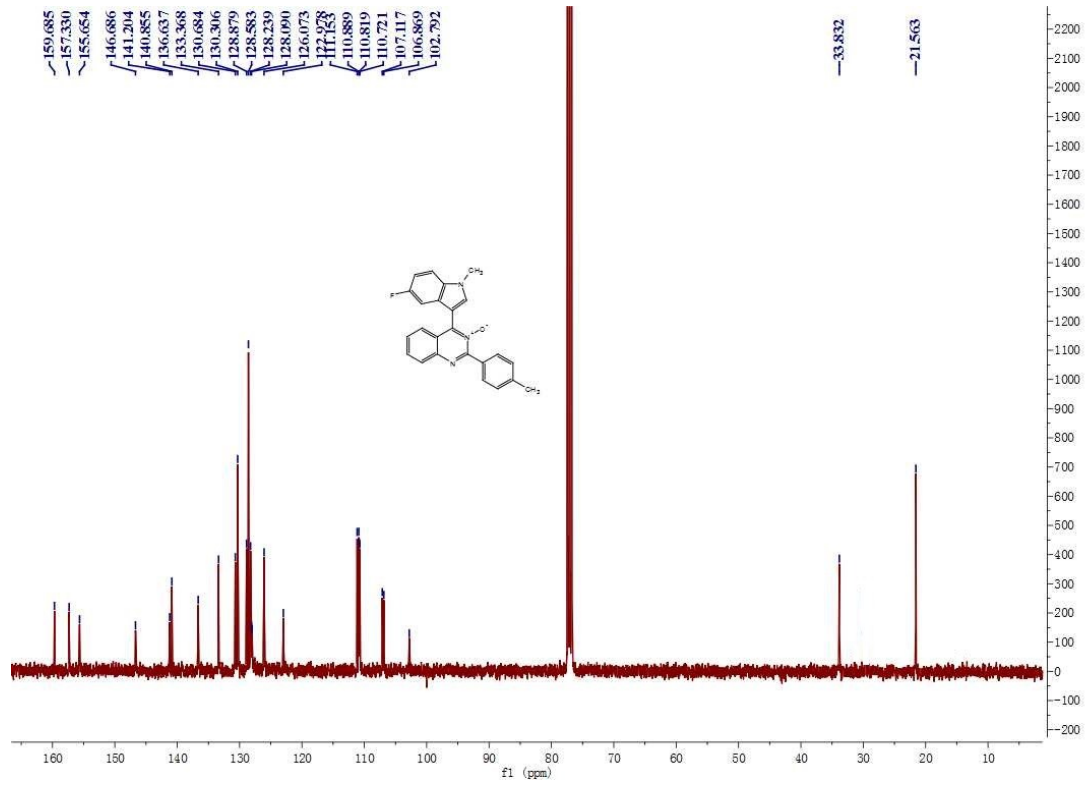

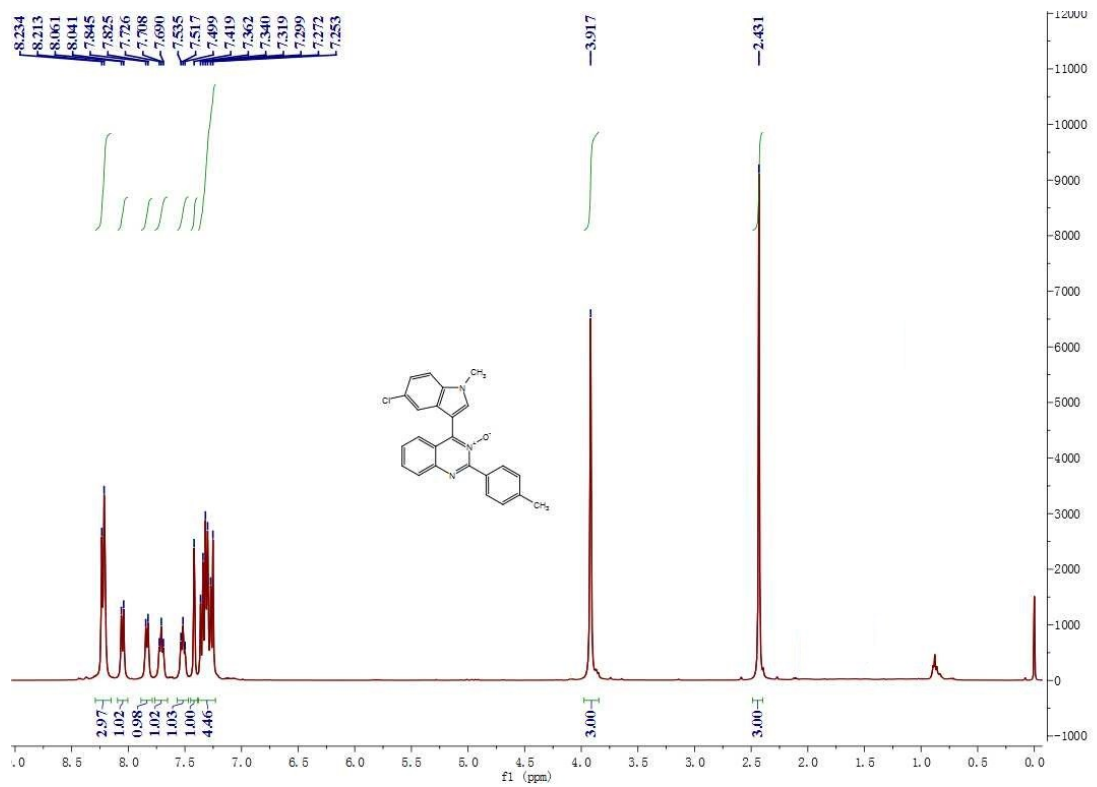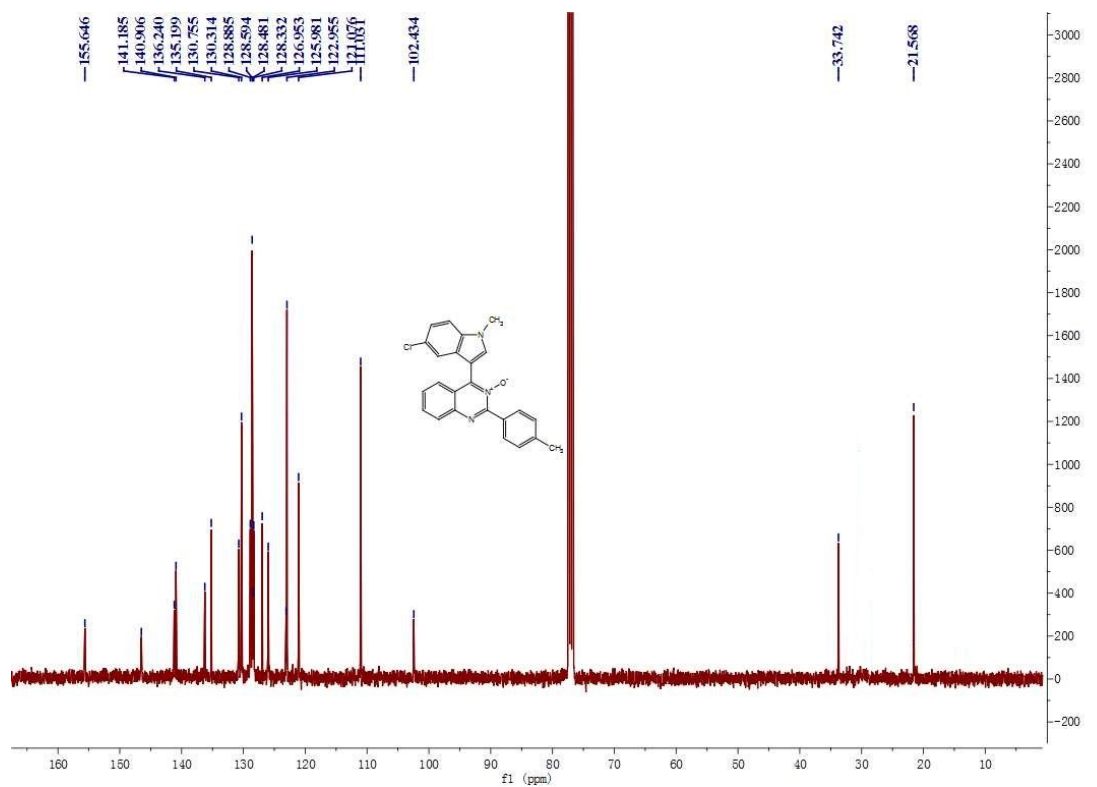

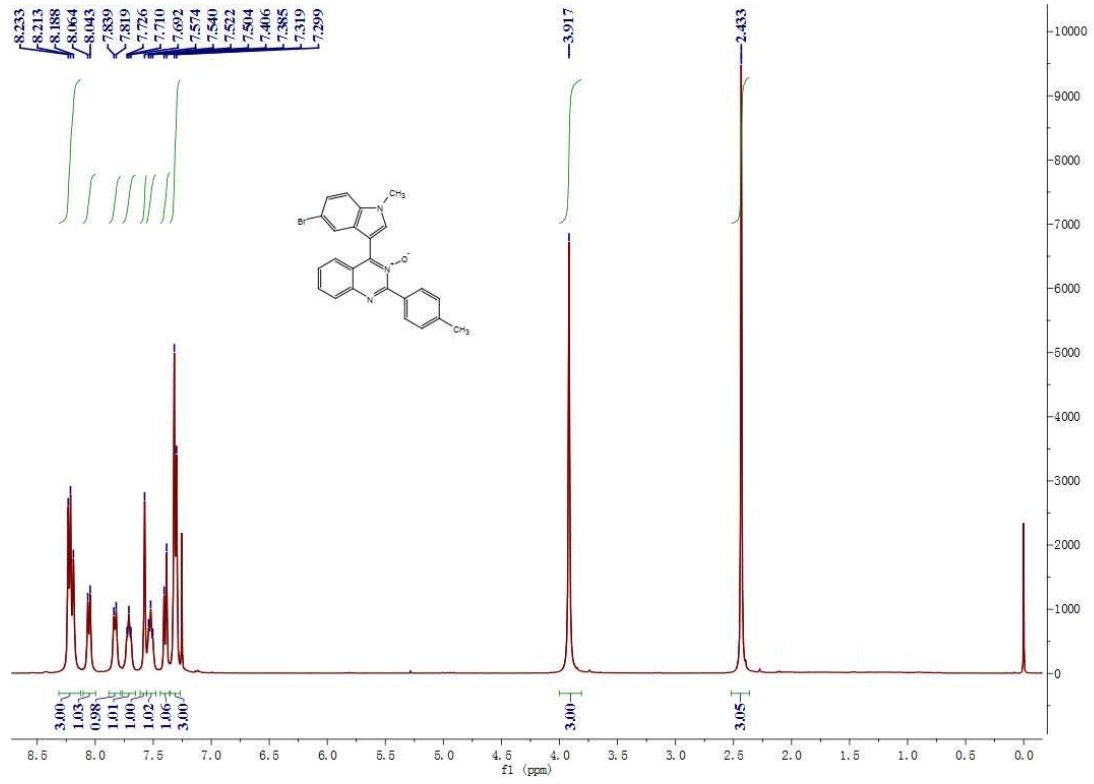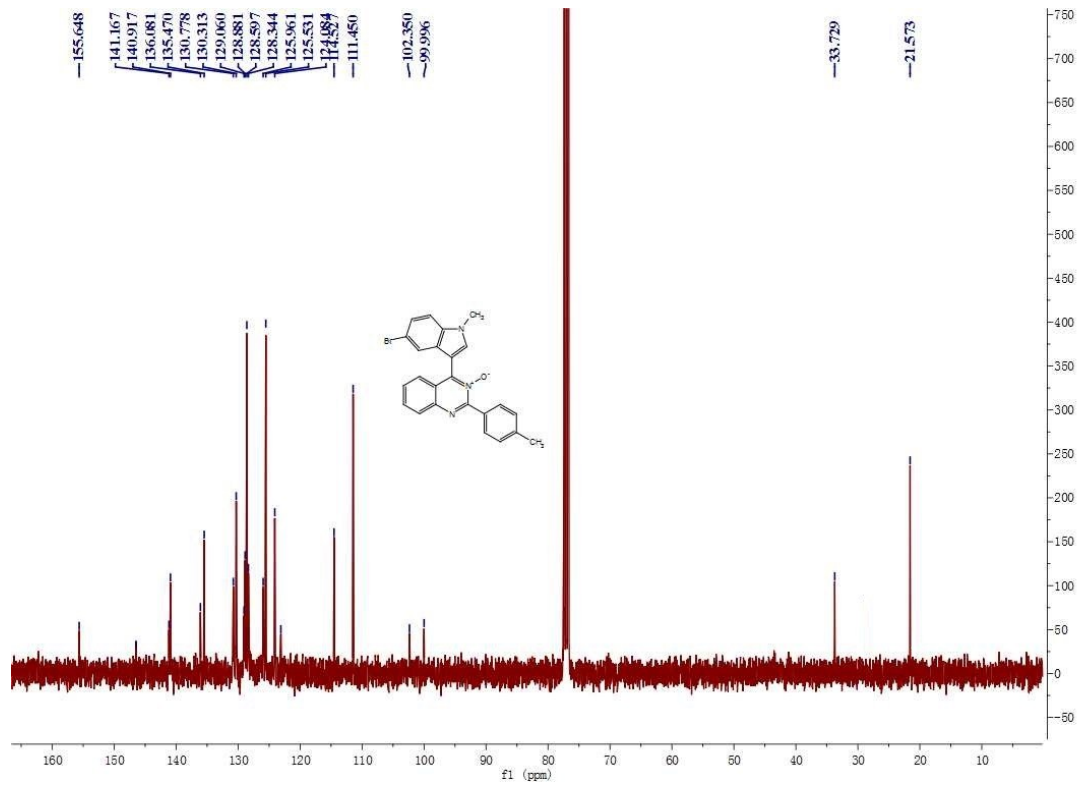



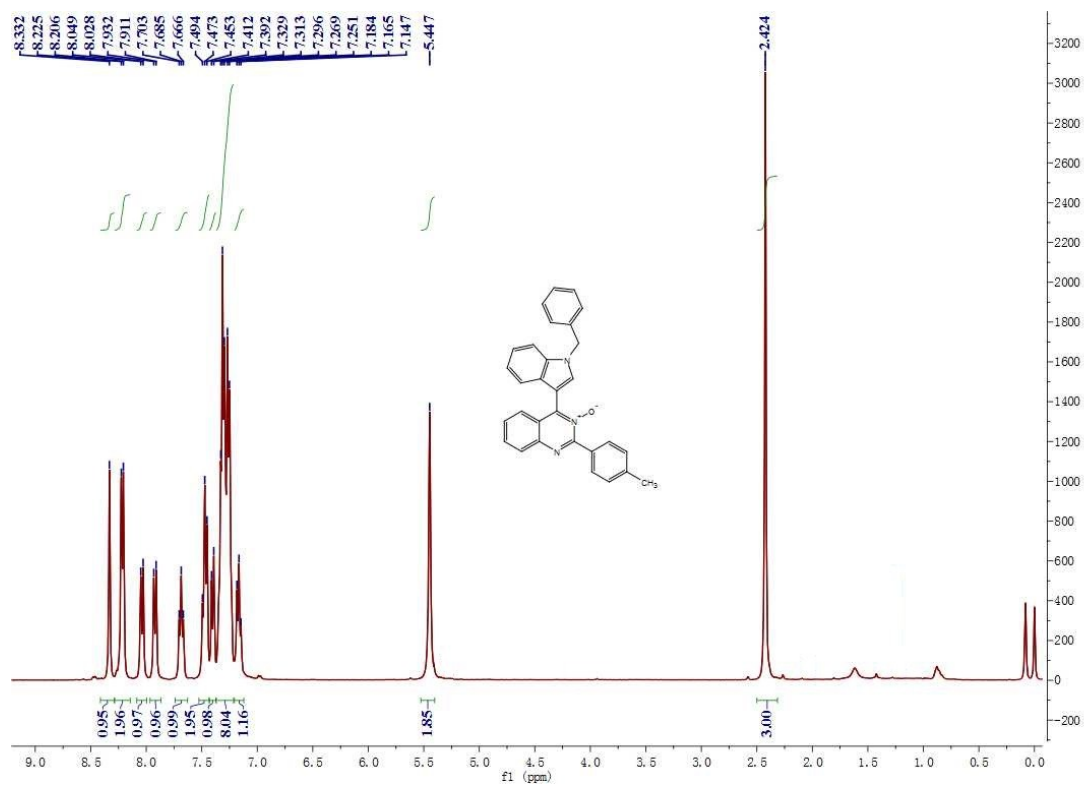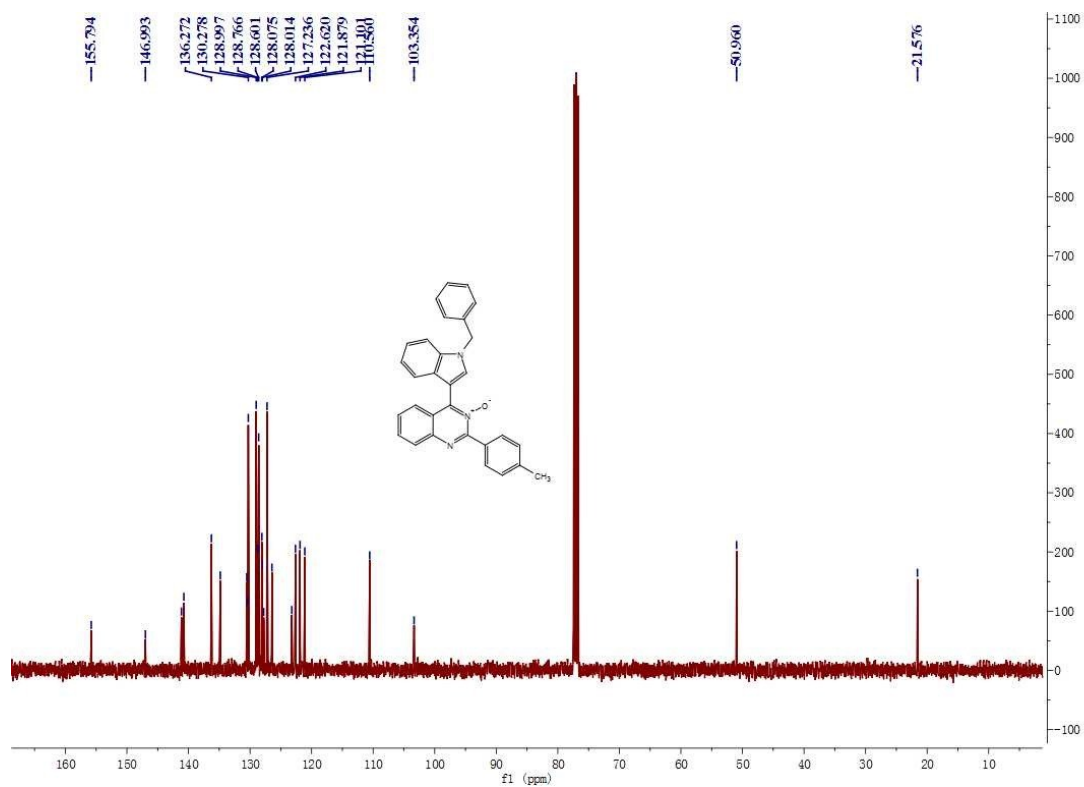

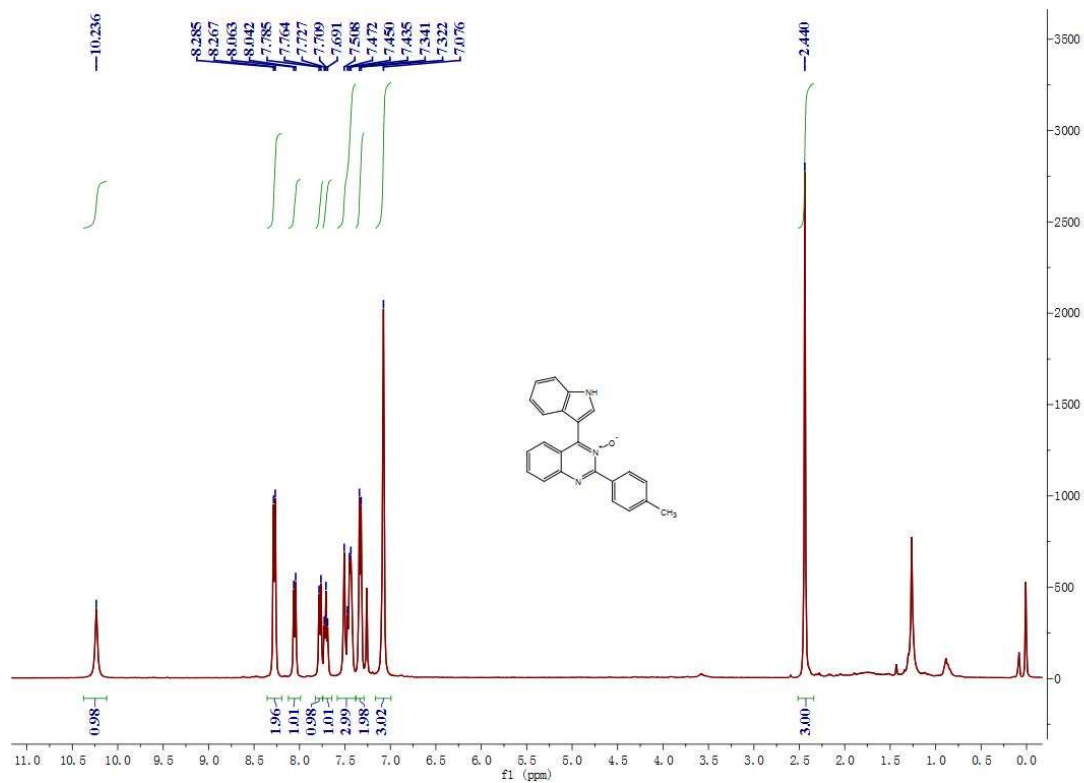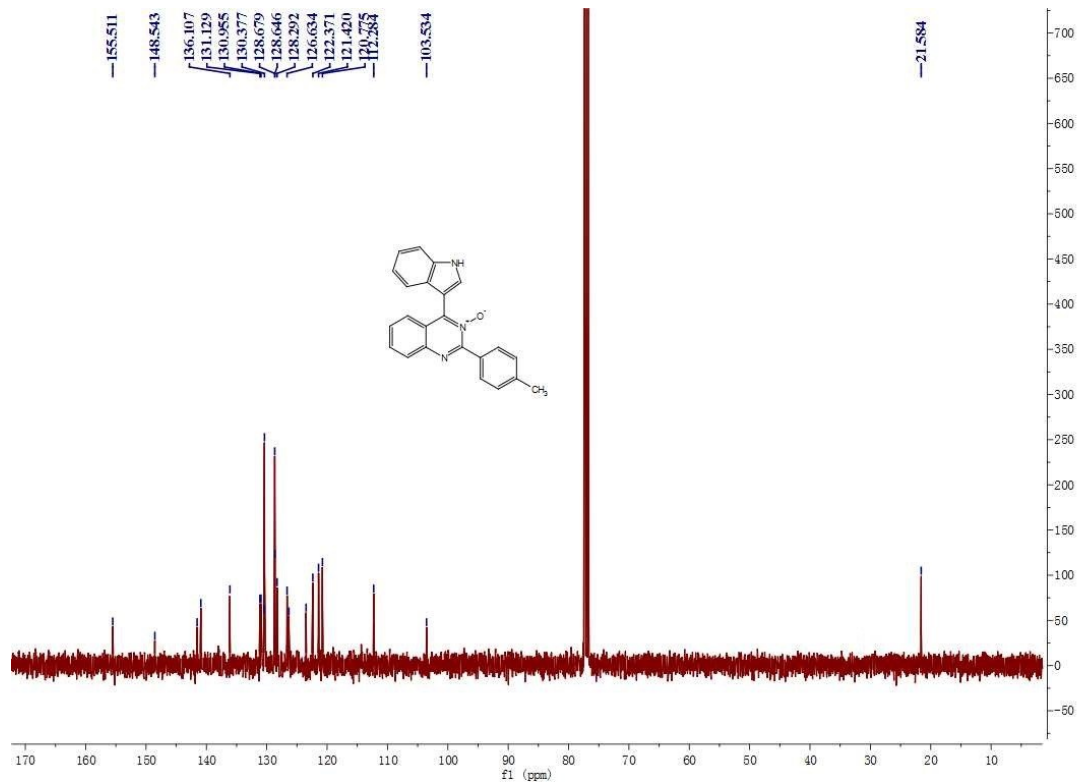

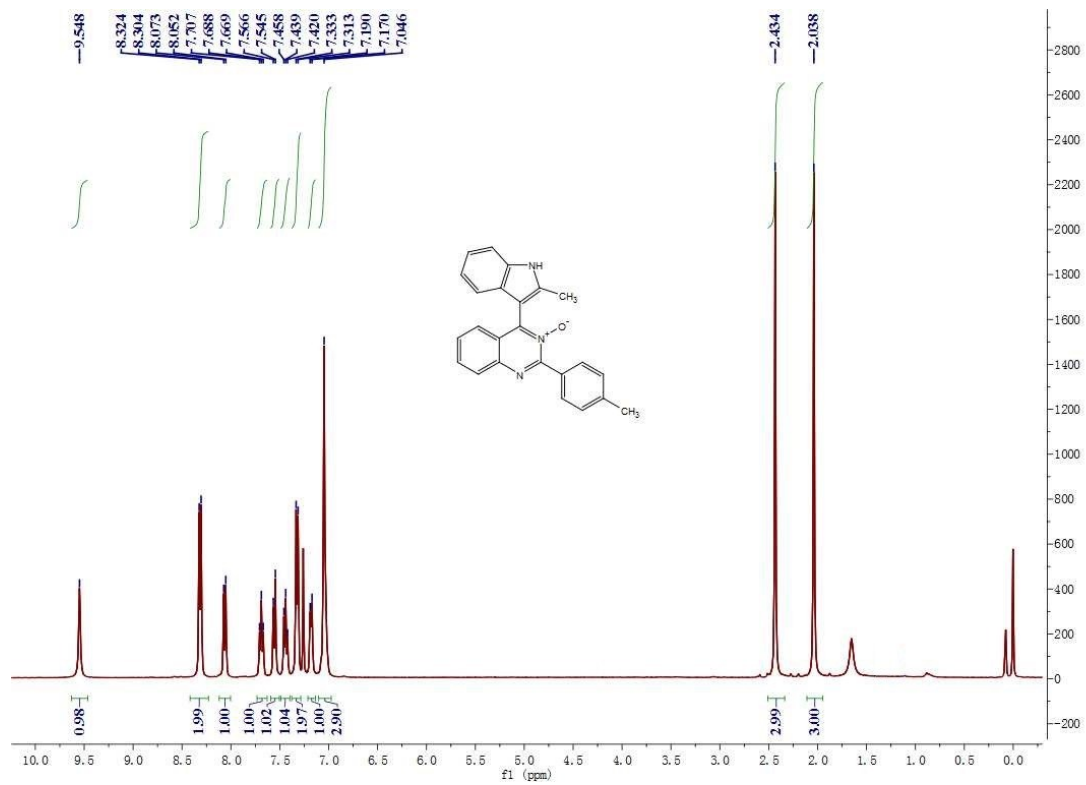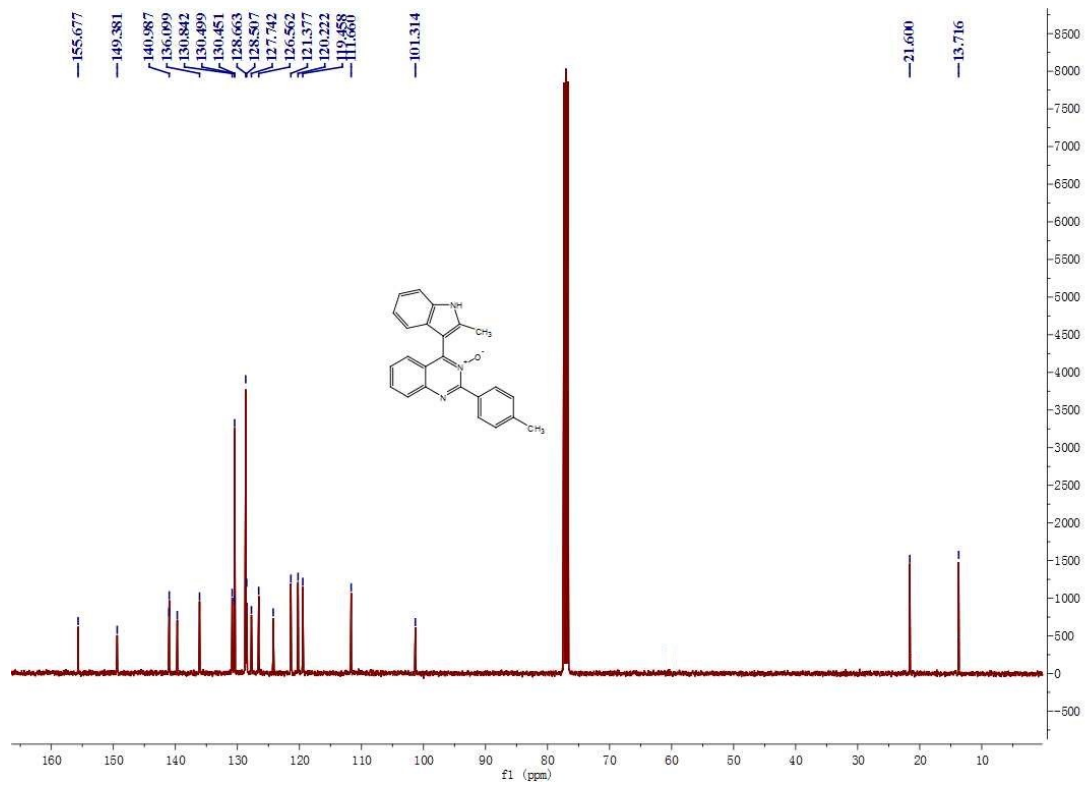

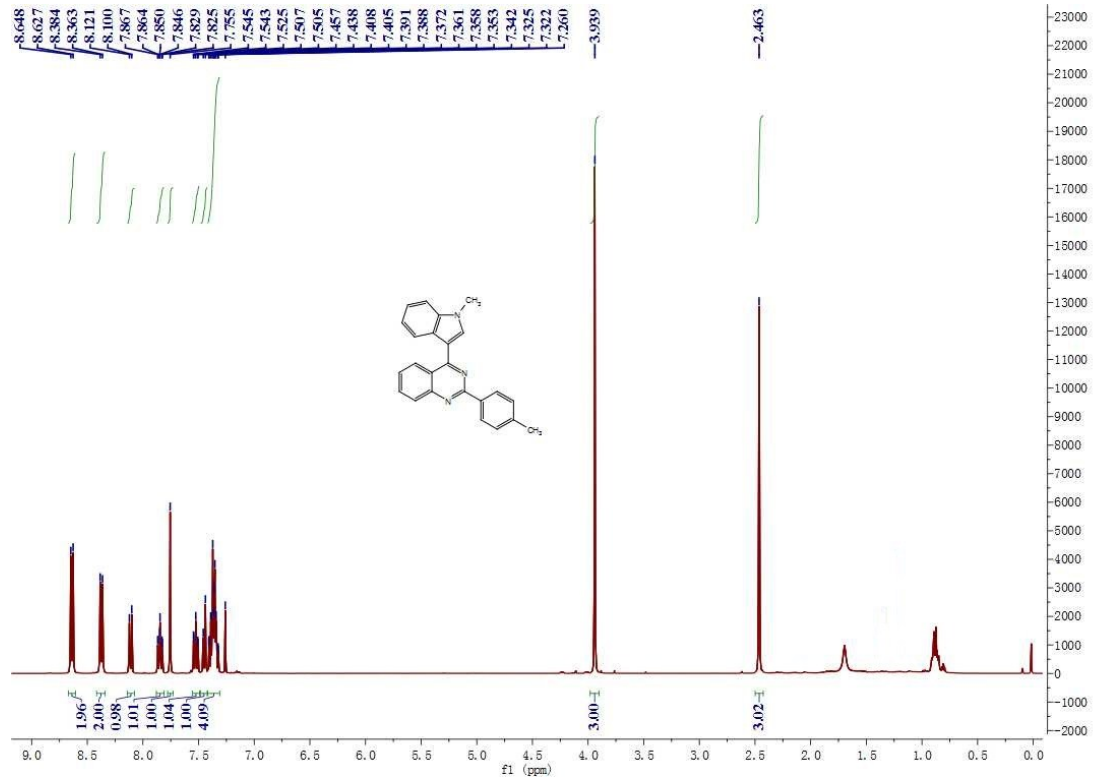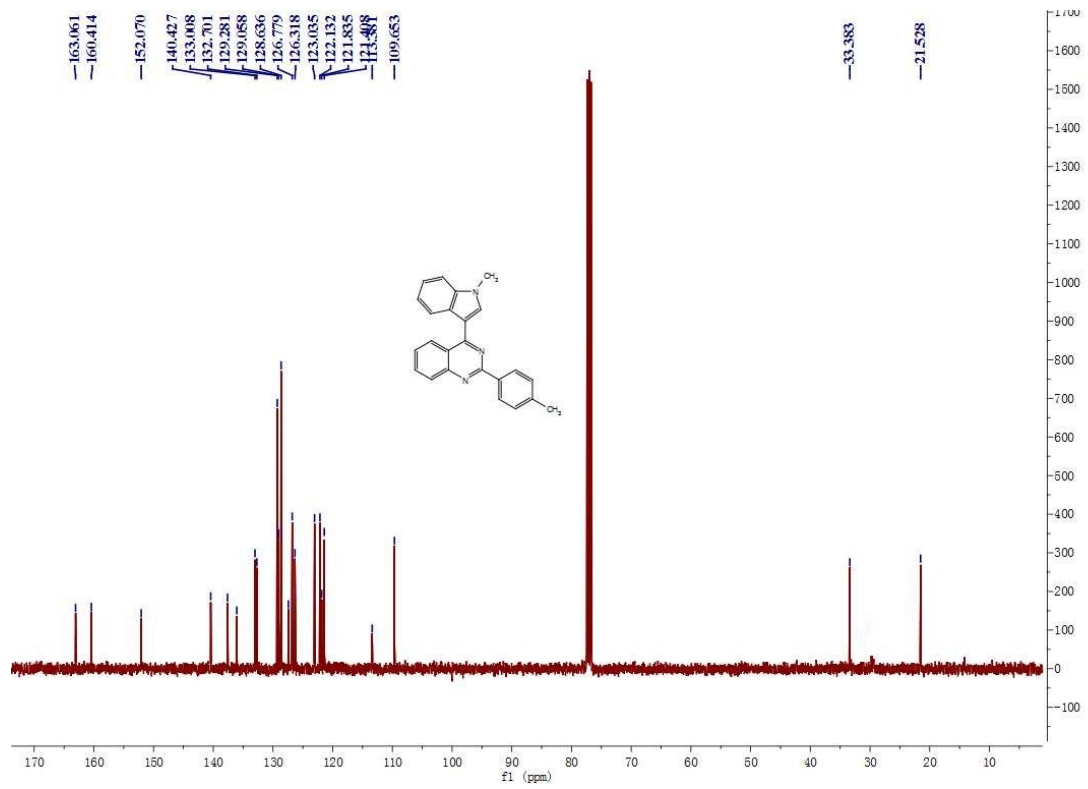

Supplement: c8ra09864f1.pdf [file c8ra09864f1.pdf]
